1 **Using *Plasmodium knowlesi* as a model for screening *Plasmodium vivax* blood-stage malaria vaccine**  
2 **targets reveals new candidates**

3  
4 Duncan N. Ndegwa<sup>1,2#a</sup>, Jessica B. Hostetler<sup>1#b</sup>, Alejandro Marin-Menendez<sup>1#c</sup>, Theo Sanderson<sup>1#d</sup>, Kioko  
5 Mwikali<sup>1#e</sup>, Lisa H. Verzier<sup>1#f</sup>, Rachael Coyle<sup>1</sup>, Sophie Adjalley<sup>1</sup>, Julian C. Rayner<sup>1#g\*</sup>

6  
7 1. Wellcome Sanger Institute, Wellcome Genome Campus, Hinxton, Cambridge CB10 1SA, UK  
8 2. Department of Biological sciences, University of Embu, Embu, Kenya

9  
10 #a Current Affiliation: Yale School of Public Health, Yale University, New Haven, USA.

11 #b Current Affiliation: National Heart, Lung, and Blood Institute, National Institutes of Health, Bethesda,  
12 MD, 20892, USA

13 #c Current Affiliation: MIVEGEC, IRD, CNRS, University of Montpellier, Montpellier, France

14 #d Current Affiliation: Francis Crick Institute, 1 Midland Road, London NW1 1AT, United Kingdom

15 #e Current Affiliation: Kenya Medical Research Institute - Wellcome Trust Research Programme, Kilifi,  
16 Kenya

17 #f Current Affiliations: The Walter and Eliza Hall Institute of Medical Research, Parkville, VIC 3052,  
18 Australia; Department of Medical Biology, University of Melbourne, Parkville, VIC 3052, Australia

19 #g Current Affiliation: Cambridge Institute for Medical Research, University of Cambridge, Cambridge  
20 Biomedical Campus, Hills Road, Cambridge CB2 0XY, United Kingdom

21 \* Corresponding author

22 Email: [jcr1003@cam.ac.uk](mailto:jcr1003@cam.ac.uk)

23

24 Short title: Screening for novel *Plasmodium vivax* blood-stage vaccine targets

25

26

27 **ABSTRACT**

28 *Plasmodium vivax* is responsible for the majority of malaria cases outside Africa. Unlike *P. falciparum*,  
29 the *P. vivax* life-cycle includes a dormant liver stage, the hypnozoite, which can cause infection in the  
30 absence of mosquito transmission. An effective vaccine against *P. vivax* blood stages would limit  
31 symptoms and pathology from such recurrent infections, and therefore could play a critical role in the  
32 control of this species. Vaccine development in *P. vivax*, however, lags considerably behind *P.*  
33 *falciparum*, which has many identified targets with several having transitioned to Phase II testing. By  
34 contrast only one *P. vivax* blood-stage vaccine candidate based on the Duffy Binding Protein (PvDBP),  
35 has reached Phase Ia, in large part because the lack of a continuous *in vitro* culture system for *P. vivax*  
36 limits systematic screening of new candidates. We used the close phylogenetic relationship between *P.*  
37 *vivax* and *P. knowlesi*, for which an *in vitro* culture system in human erythrocytes exists, to test the  
38 scalability of systematic reverse vaccinology to identify and prioritise *P. vivax* blood-stage targets. A  
39 panel of *P. vivax* proteins predicted to function in erythrocyte invasion were expressed as full-length  
40 recombinant ectodomains in a mammalian expression system. Eight of these antigens were used to  
41 generate polyclonal antibodies, which were screened for their ability to recognize orthologous proteins  
42 in *P. knowlesi*. These antibodies were then tested for inhibition of growth and invasion of both wild  
43 type *P. knowlesi* and chimeric *P. knowlesi* lines modified using CRISPR/Cas9 to exchange *P. knowlesi*  
44 genes with their *P. vivax* orthologues. Candidates that induced antibodies that inhibited invasion to a  
45 similar level as PvDBP were identified, confirming the utility of *P. knowlesi* as a model for *P. vivax*  
46 vaccine development and prioritizing antigens for further follow up.

47 **AUTHOR SUMMARY**

48 Malaria parasites cause disease after invading human red blood cells, implying that a vaccine that  
49 interrupts this process could play a significant role in malaria control. Multiple *Plasmodium* parasite  
50 species can cause malaria in humans, and most malaria outside Africa is caused by *Plasmodium vivax*.  
51 There is currently no effective vaccine against the blood stage of any malaria parasite, and progress in  
52 *P. vivax* vaccine development has been particularly hampered because this parasite species cannot be  
53 cultured for prolonged periods of time in the lab. We explored whether a related species, *P. knowlesi*,  
54 which can be propagated in human red blood cells *in vitro*, can be used to screen for potential *P. vivax*  
55 vaccine targets. We raised antibodies against selected *P. vivax* proteins and tested their ability to  
56 recognize and prevent *P. knowlesi* parasites from invading human red blood cells, thereby identifying  
57 multiple novel vaccine candidates.

## 58 INTRODUCTION

59 Malaria remains a major global health challenge, with an estimated 228 million cases and >400,000  
60 deaths in 2018 (1). While there are five *Plasmodium* species that can cause malaria in humans, the  
61 majority of clinical cases are caused by *P. falciparum* and *P. vivax*. *P. falciparum* causes almost all  
62 malaria cases in Africa, but *P. vivax* is the dominant cause of malaria in the Americas, and causes a  
63 similar number of cases as *P. falciparum* in South-east Asia (1)¶. As well as having different global  
64 distributions, the two species are also very different biologically, which has significant implications for  
65 control. *P. vivax*, along with *P. ovale*, can form hypnozoites during its liver stage, which are quiescent  
66 forms of the parasite that remain dormant from weeks to years in the liver, re-emerging upon  
67 stimulation to cause a relapse of malaria. Hypnozoites can therefore act as a continuous source of  
68 infection even in the absence of active transmission. This hurdle is made more significant by the fact  
69 that primaquine and tafenoquine, the only drugs used to treat hypnozoites, are frequently  
70 contraindicated due to their toxicity in patients with glucose-6-phosphate deficiency, a common  
71 polymorphism in regions of the world where *P. vivax* is most prevalent (2,3)¶. In addition, sexual stage  
72 development in *P. vivax* is much more rapid than in *P. falciparum* (4,5), meaning that even with rapid  
73 treatment with antimalarials, onwards transmission can still occur. These features limit the  
74 effectiveness of current chemotherapeutic interventions, making the search for an effective vaccine  
75 even more important for *P. vivax*.

76

77 The complex life-cycle of *Plasmodium vivax* parasites present multiple potential intervention strategies,  
78 including preventing transmission to the mosquito, targeting the liver stage to prevent disease and  
79 relapse, and targeting blood stages to limit disease and lower the potential of transmission from one  
80 infected individual to another. Indeed, vaccine targets across all these various stages of the parasite are

81 under investigation, although in general far fewer antigens have been studied in depth in *P. vivax*  
82 relative to *P. falciparum* (reviewed in (6,7)). This is particularly the case for blood stage targets, where  
83 only a few targets such as *P. vivax* apical membrane antigen 1 (PvAMA1) (8,9) and *P. vivax* merozoite  
84 surface protein 1 (PvMSP1<sub>19</sub>) (10,11) have advanced to pre-clinical study. The furthest advanced *P.*  
85 *vivax* vaccines, by far, are based on *P. vivax* Duffy Binding Protein (PvDBP), the only blood stage target  
86 that has reached clinical Phase Ia trials (12); these are PvDBP-II-DEKnull (12) and PvDBP-II (11–15).  
87 This is in stark contrast to *P. falciparum*, where multiple targets in different stages have been tested in  
88 Phase Ia (Reviewed in (6)), and the RTS,S pre-erythrocytic vaccine has advanced beyond Phase III to  
89 pilot testing across three countries in Africa (16). More *P. vivax* targets clearly need to be screened if  
90 vaccine development for this species is to advance.

91

92 It was previously believed that *P. vivax* was completely dependent on the interaction between PvDBP  
93 and its receptor, Duffy Antigen Receptor for Chemokine (DARC) (17–20) to invade human erythrocytes.  
94 However, it has recently been shown that *P. vivax* is also able to infect individuals who are Duffy  
95 negative, so express little or no DARC on the surface of their erythrocytes (21–24). While the invasion  
96 of Duffy negative erythrocytes could still rely on PvDBP (25,26), the sole focus on PvDBP as a vaccine  
97 candidate clearly needs to be reassessed and additional targets evaluated, either as potential  
98 substitutes for PvDBP, or to be used in combination with it. As noted above, erythrocyte invasion is a  
99 very complex process, and while the process is much less well-understood in *P. vivax* than it is in *P.*  
100 *falciparum* (27), other *P. vivax* ligands such as reticulocyte-binding protein 2 (RBP2b) (28), GPI-  
101 anchored micronemal antigen (GAMA) (29), and erythrocyte binding protein 2 (ebp2) (30) have all  
102 been shown or proposed to be involved, enabling the identification of possible combinatorial vaccines  
103 (31).

104

105 In this study we took a reverse vaccinology approach to identify new *P. vivax* vaccine targets, building  
106 on previous work where we expressed a panel of 37 full-length recombinant *P. vivax* vaccine targets  
107 predicted to be involved in erythrocyte invasion (32)¶. Polyclonal antibodies were generated against 8  
108 of these proteins, and the antibodies were tested for their ability to inhibit merozoite invasion. *P. vivax*  
109 preferentially invades immature erythrocytes (33)¶ which are difficult to obtain (34–37), which has  
110 limited the development of continuous culture of *P. vivax in vitro*, despite herculean efforts (38). As a  
111 first-stage screen we therefore performed invasion inhibition assays using *P. knowlesi*, a close  
112 phylogenetic relative of *P. vivax* (39,40) that has been adapted to *in vitro* cell culture in human  
113 erythrocytes (41,42). We also took advantage of the amenability of *P. knowlesi* to genetic manipulation  
114 to explore the function of some of the target genes, and to swap *P. knowlesi* genes for their *P. vivax*  
115 orthologues to establish whether this would affect antibody inhibition. Together, this work prioritises  
116 new targets for *P. vivax* vaccine development, and presents additional evidence that *P. knowlesi* can be  
117 used as a readily manipulatable *in vitro* model for *P. vivax*.

118

## 119 RESULTS

### 120 Generation of polyclonal antibodies against new *P. vivax* vaccine candidates

121 We have previously expressed a pilot library of 37 *P. vivax* proteins that were either shown to localise  
122 to merozoite organelles with a role in invasion, or were predicted to do so based on the localisation of  
123 their respective *P. falciparum* homologues (32). In all cases, the full-length extracellular domains of  
124 these proteins were expressed using a mammalian protein expression system. This approach, which  
125 increases the likelihood of correct folding of disulphide-linked extracellular domains, has been used  
126 extensively for *P. falciparum* invasion-associated proteins (43) to generate antigens capable of inducing  
127 potent invasion-inhibitory antibodies, including for the major *P. falciparum* blood-stage vaccine target  
128 PfRh5 (31,44) [2]. Comparing immunoreactivity of native or heat-denatured epitopes and testing for  
129 protein-protein interactions indicated that the produced *P. vivax* library was also likely to consist of  
130 largely functional proteins (32) [2]. To test whether this library could also be used to generate inhibitory  
131 antibodies, rabbit polyclonal antibodies were raised against eight targets, selected to represent a range  
132 of predicted subcellular localizations and including PvDBP as a positive control (Table 1). In all cases,  
133 antibodies were raised against the complete recombinant ectodomain of the candidates. As outlined in  
134 the Methods, 1mg of antigen was used to immunize each rabbit, and total IgG purified from serum  
135 using Protein A affinity chromatography.

136

### 137 Anti-*Plasmodium vivax* antibodies are able to recognise orthologues in *P. knowlesi*

138 Given the inherent difficulty in acquiring *P. vivax ex vivo* isolates for testing, we explored the use of *P.*  
139 *knowlesi*, which has recently been adapted to continuous *in vitro* cell culture in human erythrocytes  
140 (41,42) as a model for *P. vivax* vaccine candidate screening. *P. knowlesi*, which falls into the same clade  
141 of simian parasites as *P. vivax* (39,40) naturally infects the Kra cynomolgus macaque (*Macaca*

142 *fascicularis*) but causes severe zoonotic malaria in Southeast Asia (45), falls into the same clade of  
143 simian parasites as *P. vivax* (39,40). While this phylogenetic relationship is reflected in a higher of  
144 conservation between the *P. vivax* and *P. knowlesi* genomes than the *P. vivax* and *P. falciparum*  
145 genomes (39), the degree of conservation varies between at the individual gene level. Sequence  
146 alignment between our *P. vivax* candidate proteins and their orthologues in *P. knowlesi* showed a range  
147 of sequence similarities (Table 1), from a pairwise identity score of 51% for PvDBP and its closest *P.*  
148 *knowlesi* orthologue PkDBP $\alpha$ , to higher identity scores for several targets (PvGAMA, Pv12, PvARP,  
149 PvCyRPA and Pv41), reaching 80% in the case of Pv41. In contrast, a lower degree of conservation was  
150 found for the merozoite surface proteins PvMSP3.10 and PvMSP7.1, both members of multigene  
151 families which are known to be highly polymorphic within and between *Plasmodium* species.

152

153 To explore whether variable degrees of homology would limit our ability to test specific targets in *P.*  
154 *knowlesi*, we first determined whether antibodies raised against *P. vivax* (Pv) targets can recognise their  
155 *P. knowlesi* (Pk) orthologues in immunoblots using *P. knowlesi* schizont-stage protein lysates (Figure 1).  
156 Antibodies raised against Pv12, PvARP, Pv41, PvMSP7.1 and PvDBP produced a single immuno-reactive  
157 band, while several bands were detected with antibodies against PvGAMA, PvMSP3.10 and PvCyRPA,  
158 suggesting either post-translational modifications or proteolytic processing events. While multiple  
159 factors could affect signal strength, including expression level in schizont stages, there was a correlation  
160 between % Pv/Pk identity and the strength of the immunoblot signal, PvCyRPA being the exception with  
161 a weak detection signal despite 68% identity. Antibodies against Pv12, PvGAMA, PvMSP3.10, PvCyRPA  
162 all detected proteins around their expected molecular weight based on estimates from the  
163 corresponding orthologous protein in *P. knowlesi*. In contrast, anti-PvARP, Pv41 and PvMSP7.1 detected  
164 proteins larger than the expected molecular weight suggesting that they might migrate more slowly,



165 which is not uncommon in extracellular proteins. Anti-PvDBP detected a protein half the expected size  
166 suggesting either that PkDBP $\alpha$  (the closest *P. knowlesi* orthologue of PvDBP) is highly processed, or that  
167 anti-PvDBP antibodies cross-react with multiple PkDBP proteins. Overall however, immunoblotting  
168 showed that the majority of anti-*P. vivax* antibodies recognised *P. knowlesi* proteins.

169

170 **Anti-*P. vivax* antibodies are able to localise orthologous target proteins to *P. knowlesi* invasion**  
171 **organelles**

172 To further explore the use of *P. knowlesi* as a model for *P. vivax* reverse vaccinology studies, we tested  
173 the antibodies in indirect immunofluorescence assays using mature *P. knowlesi* schizonts (Figure 2).  
174 Out of the 8 polyclonals, only anti-PvMSP3.10 (which shows the lowest percentage of identity between  
175 Pv and Pk) did not produce a specific signal (Figure 2). Anti-PvGAMA, PvCyRPA, PvDBP and PvARP all  
176 labelled punctate foci within the merozoites, while anti-Pv12, Pv41 and PvMSP7.1 all appeared to label  
177 the entire merozoite surface. No staining was observed with pre-immune antiserum (Figure S1),  
178 confirming that the labelling was antigen-specific.

179

180 To establish the specific location of each antigen, anti-*P. vivax* antibodies were used in co-localization  
181 experiments with antibodies specific to proteins of known cellular locations i.e. AMA1, MSP1-19 and  
182 GAP45 located in microneme, merozoite surface and inner membrane complex (IMC), respectively (see  
183 Methods for antibody sources). Anti-Pv12, Pv41 and PvMSP7.1 all showed a clear co-localization with  
184 anti-MSP1 (Figure 3A, Figure S2A) suggesting that their orthologous targets are located on the  
185 merozoite surface. Anti-PvGAMA and, to a lesser extent, anti-PvCyRPA and anti-PvDBP co-localised with  
186 anti-AMA1, suggesting that their orthologous targets are located in apical secretory organelles such as  
187 the micronemes (Figure 3B, Figure S3). Anti-ARP appeared to be apically located but did not co-localise

188 with any known markers that we tested (Figure 3B and Figure S3), such that its exact location remains  
189 to be determined. To confirm that antibodies against Pv12, Pv41 and PvMSP7.1 were labelling the  
190 merozoite surface and not the IMC, which produce similar staining patterns in late schizonts, co-staining  
191 with the IMC marker anti-GAP45 was also carried out in early schizonts, as the IMC and merozoite  
192 surface are easier to distinguish earlier in the cell cycle. In all cases there was no co-localisation with  
193 anti-GAP45 in early schizonts (Figure S2B), confirming a merozoite surface, not an IMC, location. In all  
194 cases the co-localization of the anti-*P. vivax* antibody targets as determined by immunolocalisation were  
195 identical to those predicted based on their *P. falciparum* homologues.

196

#### 197 **Screening anti-*P. vivax* antibodies for inhibitory activity in *P. knowlesi* identifies novel invasion-** 198 **blocking candidates**

199 Having established that anti-*P. vivax* antibodies could be used to specifically detect homologues in *P.*  
200 *knowlesi*, we explored whether the same antibodies could inhibit *P. knowlesi* erythrocyte invasion or  
201 intra-erythrocytic development. Serial two-fold dilutions of purified total IgG were prepared starting  
202 from 10 mg/ml, and incubated with synchronized ring-stage *P. knowlesi* parasites for 24 hours. Assays  
203 were carried out in two biological replicates each with three technical replicates, where invasion and  
204 growth inhibition were measured by flow cytometry using Far-red Cell Trace staining of erythrocyte and  
205 SYBR green staining of parasite DNA. Invasion was quantified as the percentage of erythrocytes that  
206 were both SYBR green and Far-red Cell Trace positive as compared to only control treated erythrocytes,  
207 while growth was quantified as the percentage of cells that were only SYBR green positive as compared  
208 to control treated erythrocytes. As shown in Figure 4 and Table 2, compared to the positive and  
209 negative controls for inhibition (heparin and rabbit IgG respectively), inhibitory activity fell into two  
210 broad groups: inhibitory (top panel, anti-Pv12, Pv41, PvGAMA and PvDBP which gave IC<sub>50</sub> values of 4.17,

211 11.24, 6.64 and 4.54 mg/ml respectively) and not inhibitory (bottom, anti-PvARP, PvCyRPA, PvMSP7.1,  
212 PvMSP3.10). The low level of inhibition observed with anti-PvMSP7.1 and PvMSP3.10 could be due to  
213 the low degree of homology between Pv and Pk homologs, and the lack of inhibition observed with the  
214 anti-PvMSP3.10 was consistent with the absence of cross-reactivity with PkMSP3 homologues in  
215 immunofluorescence assays. Strong inhibition with anti-PvDBP, the only *P. vivax* blood stage vaccine  
216 target in the advanced stage of vaccine development, was confirmatory and comparable to other  
217 studies (46). Antibodies to two other targets, Pv12 and PvGAMA, had broadly similar IC<sub>50</sub>s to anti-  
218 PvDBP, while antibodies to Pv41, which interacts with Pv12 (32), also had strong inhibition. All three  
219 targets were therefore worthy of further investigation.

220

## 221 **Gene editing in *P. knowlesi* establishes that Pk41 and PkGAMA are not essential for blood-stage** 222 **growth**

223 Gene essentiality is one potential prioritisation factor in ranking vaccine candidates, as targeting the  
224 product of a gene that is absolutely required for parasite development is by definition more likely to  
225 yield growth inhibitory activity. Given that antibodies against Pv12, Pv41, and PvGAMA all inhibited *P.*  
226 *knowlesi* growth, we used genome editing to determine whether the orthologous genes in *P. knowlesi*  
227 could be knocked out. We also targeted *PkARP* as a positive control, as anti-PvARP antibodies had no  
228 inhibitory effects on *P. knowlesi* (Figure 4), while constructs targeting *PkDBP* $\alpha$  were included as a  
229 negative control, as this gene has previously been shown to be essential (47). Gene targeting was  
230 carried out using a CRISPR-Cas9 two-vector approach, with one vector containing Cas9 and guide RNA  
231 expression cassettes as well as the selection marker, while the other one was a donor template for  
232 repair consisting of eGFP flanked by 5' and 3' untranslated regions of each respective gene (Figure  
233 S4A). Thus, after drug selection based on the selection marker in the guide vector and not in the donor

234 vector, integration of the construct would both eliminate the endogenous gene, and result in eGFP  
235 expression. Transfection of *P. knowlesi* was followed by selection with 100 nM pyrimethamine for 6  
236 days to select for Cas9 expression, and cultures were maintained for up to 3 weeks. Transfections were  
237 repeated at least twice for each pair of constructs.

238

239 Parasites were recovered from all transfections. Genomic DNA was extracted from recovered lines, and  
240 used for genotyping to establish whether integration had occurred. Only parasites transfected with  
241 *Pk41* and *PkGAMA* knockout constructs gave bands of the size expected if gene deletion had occurred  
242 (Figure S4B). Whole genome sequencing analysis confirmed this result, showing no reads mapping to  
243 the deleted regions of the wildtype (WT) *P. knowlesi* genome (Figure S5 and S6), indicating that  
244 integration of the knock-out construct had occurred. By contrast, genotyping of parasites transfected  
245 with *Pk12*, *PkARP* and *PkDBP $\alpha$*  constructs did not differ from WT cultures. No WT band was amplified  
246 for *Pk41* and *PkGAMA* knockout lines, whereas WT parasite controls yielded bands of the expected size  
247 (Figure S4B). *Pk41* and *PkGAMA* therefore appear to be non-essential for *P. knowlesi* growth, whereas  
248 *Pk12*, *PkARP* and *PkDBP $\alpha$*  were not able to be disrupted using this approach. For *PkARP* this was  
249 unexpected, given that anti-PvARP antibodies had no effect on growth or invasion and the three  
250 different guide RNAs used for this gene were effective in targeting this locus in subsequent experiments,  
251 shown below.

252

253 To confirm that *Pk41* and *PkGAMA* expression was absent in the knockout lines, fluorescence and  
254 immunofluorescence assays were performed. Both knockout lines expressed eGFP (Figure 5A and B),  
255 while localisation assays with anti-Pv41 and anti-PvGAMA gave no specific signal (Figure 5C), showing  
256 only background staining in clear contrast to WT parasites (Figures 3 and 4). This confirms that these

257 parasites were not expressing Pk41 and PkGAMA, and therefore that *Pk41* and *PkGAMA* are redundant  
258 for intra-erythrocytic growth, despite the fact that anti-P41 and anti-GAMA antibodies were shown to  
259 inhibit parasite growth (Figure 4). Testing the antibodies in growth assays using the knockout strain  
260 showed no detectable inhibition, confirming that the antibodies were specific to their immunogens  
261 (Figure 6).

262

### 263 **Allele replacement of *P. knowlesi* genes with *P. vivax* orthologues increases the inhibitory effect of** 264 **anti-*P. vivax* antibodies**

265 A true test of the inhibitory effectiveness of the anti-*P. vivax* antibodies would be in the context of the  
266 proteins that they were raised against, but *P. vivax* culture and invasion assays are not available for  
267 routine use. To test an alternative approach, we sought to replace *P. knowlesi* target genes with their  
268 *P. vivax* orthologues, generating chimeric *P. knowlesi* strains expressing *P. vivax* proteins. Replacement  
269 constructs were created in which the *Pv12*, *Pv41*, *PvGAMA* and *PvARP* open reading frames were  
270 flanked by the 5' and 3' UTRs of their *P. knowlesi* counterparts, and these were transfected in  
271 combination with the same Cas9/gRNA vectors used in the knockout studies, in order to replace *Pk12*,  
272 *Pk41*, *PkGAMA* and *PvARP* with *Pv12*, *Pv41*, *PvGAMA* and *PvARP* respectively (Figure S7). After selection  
273 of transfected parasites with 100 nM pyrimethamine and expansion of the resulting parasites lines,  
274 genomic DNA was extracted for genotyping. All lines gave bands of the expected size (Figure S7)  
275 indicating that integration of these replacement constructs had occurred at the expected locus, and no  
276 WT bands were detected. Whole genome sequencing analysis confirmed that no reads mapped at the  
277 targeted region when comparing with Pk reference genome (Figures S8-11).

278

279 Localisation assays with anti-Pv12, PvARP, Pv41 and anti-PvGAMA antibodies all gave specific signals in  
280 the replacement lines (Figure 7) with anti-Pv12 and Pv41 (Figure 7A and 7C) indicating merozoite  
281 surface localisation, while anti-PvGAMA and PvARP (Figure 7B and 7D) appeared as punctate signals,  
282 just like signals in wildtype *P. knowlesi* parasites (Figures 2 and 3). These chimeric parasites are  
283 therefore viable and able to correctly express and localize Pv12, PvARP, Pv41 and PvGAMA. The  
284 chimeric *P. knowlesi* strains had similar growth rates as the WT strains (Figure S12), indicating that the  
285 *P. vivax* genes can substitute for the function of their *P. knowlesi* counterparts, emphasizing the  
286 phylogenetic relationship between the two parasites. To test whether replacing the *P. knowlesi* genes  
287 with their *P. vivax* counterparts increased the inhibitory activity of anti-*P. vivax* antibodies, we tested  
288 for growth and invasion inhibition, comparing WT and chimeric replacement lines. In all cases inhibition  
289 was increased when using the chimeric lines (Figure 8), indicating that while *P. knowlesi* is a useful  
290 model as a first screen for *P. vivax* reverse vaccinology studies, sequence differences between *P. vivax*  
291 antigens and their *P. knowlesi* orthologues can lead to underestimation of the inhibitory effect when  
292 only wildtype *P. knowlesi* parasites are used.

## 293 **DISCUSSION**

294 To date only a limited number of *Plasmodium vivax* blood stage vaccine candidates have been  
295 investigated (reviewed in (6,7,48,49)). This is in large part because it is currently not possible to  
296 continuously culture *P. vivax* blood stages *in vitro*, which rules out many biological assays. We have  
297 explored whether *P. knowlesi*, which has a close phylogenetic relationship with *P. vivax* (39,40) and has  
298 been adapted to *in vitro* culture in human erythrocytes (41,50), could be used to screen for *P. vivax*  
299 blood-stage vaccine candidates, as it can for drug-resistance candidates (51). Such an approach has  
300 proven viable to explore the most advanced *P. vivax* blood-stage vaccine candidate, PvDBP (46). In this  
301 case we sought to apply the *P. knowlesi* model to systematically screen for new blood-stage antigens,  
302 using a panel of polyclonal antibodies generated against candidates from a previously published library  
303 of *P. vivax* schizont expressed proteins (32). A similar approach has recently been applied to a panel of  
304 *P. vivax* blood stage targets, although functional testing did not include knockout and gene replacement  
305 strategies (52). We focused on seven *P. vivax* targets: two merozoite surface proteins (PvMSP7.1 and  
306 PvMSP3.10); two 6-Cysteine domain proteins (Pv12 and Pv41) and three proteins not belonging to other  
307 families (PvGAMA, PvCyRPA and PvARP), with PvDBP included as a positive control.

308  
309 There was a broad correlation between the ability of anti-*P. vivax* antibodies to specifically recognise  
310 their *P. knowlesi* orthologues in immunoblot and immunofluorescence assays and the percent identity  
311 within the *P. vivax/P. knowlesi* antigen pairs. However, it is worth noting that a single dominant protein  
312 band was identified in 5/8 cases, and clear intracellular localisations defined in 7/8 cases, despite levels  
313 of identity as low as 50%, suggesting the system has broader utility than homology levels alone might  
314 indicate. This high level of cross-reactivity may be in part be due to our strategy of raising polyclonal  
315 antibodies against full-length protein ectodomains, whereas many antigen studies focus only on smaller

316 sub-domains, which limits the chances that cross-reactive responses will be generated. There is also  
317 some evidence that the eukaryotic expression system we use increases the likelihood of generating  
318 antibodies against folded, functional domains (43), which are more likely to be of utility in assays such  
319 as immunofluorescence or growth inhibition, where conformation-dependent epitopes are more  
320 important. Using these antibodies in growth inhibition assays revealed robust dose-dependent  
321 inhibition of *P. knowlesi* growth by anti-Pv12, Pv41 and PvGAMA antibodies, in some cases on a similar  
322 level to anti-PvDBP.

323

324 Pv12 and Pv41 are members of a family of 6-cysteine domain proteins, other members of which are  
325 under investigation as transmission-blocking vaccine targets in *P. falciparum* (53–55). The *P. falciparum*  
326 orthologues of Pv12 and Pv41 form a heterodimer and are localised on the merozoite surface (56). We  
327 have previously shown that Pv12 and Pv41 are also able to heterodimerize (32), and here we show that  
328 their *P. knowlesi* orthologues also colocalise to the merozoite surface, suggesting key elements of the  
329 function of these two proteins are conserved across *Plasmodium* species. However, there are also  
330 elements that are different. Immunoepidemiology studies show that antibody responses to Pv12 and  
331 Pv41 are commonly induced by exposure to *P. vivax* infection (32,57–59), and have been associated  
332 with protection against severe *P. vivax* malaria, in keeping with the inhibitory activity of anti-Pv12 and  
333 Pv41 antibodies shown here. By contrast, in *P. falciparum*, anti-Pf12 and Pf41 antibodies have no  
334 inhibitory effects on parasite growth *in vitro*, and the genes can be deleted, suggesting a level of  
335 functional redundancy in this species (56). Previous immunofluorescence studies of Pv12 in *P. vivax*  
336 suggest that it localises to the rhoptries, rather than merozoite surface as in our experiments (60)□,  
337 although whether this apparent difference is due to differences in the stage of the parasite during  
338 erythrocytic schizogony used in the assays is not known.



339

340 We localised PkARP to the apical region of the merozoite, suggesting a possible location in the rhoptries  
341 like the PfARP homologue in *P. falciparum* (60), but in contrast to previous studies suggesting a  
342 merozoite surface location in *P. vivax* and *P. knowlesi* (52,61); again, experimental differences in the  
343 stage of parasites used might explain the different observations. PkGAMA also localised to apical  
344 organelles, replicating previous observations of a micronemal location in *P. vivax* (29) and *P. falciparum*  
345 (62,63). We were unable to inhibit *P. knowlesi* growth using anti-PvARP antibodies, contradicting what  
346 has been shown in *P. knowlesi* (64) and *P. falciparum* (60). However, when we replaced PkARP with  
347 PvARP, there was a reversal of the activity of anti-PvARP, suggesting that PkARP may lack key inhibitory  
348 epitopes recognised by our polyclonals, which were raised against PvARP. Anti-PvGAMA had invasion  
349 and growth inhibitory effects on *P. knowlesi* in both WT and chimeric lines, replicating the observations  
350 of anti-PfGAMA effects on *P. falciparum* (63), suggesting a conserved role of this protein in invasion  
351 across species. Immunoepidemiology studies also show that antibody responses to PvARP and PvGAMA  
352 are commonly induced by exposure to *P. vivax* infection (14,32,57–58,65), and have been associated  
353 with protection against severe *P. vivax* malaria.

354

355 How do these relatively new candidates compare to the much more well-studied vaccine candidate  
356 PvDBP? Clearly PvDBP has been the subject of decades of work, meaning that there are multiple lines  
357 of evidence supporting its candidacy. The limitations of this target are also well known, specifically the  
358 challenge of strain-specific antibody responses, which may be able to be overcome with epitope  
359 engineering (28,66–68). One question in weighing up the candidacy of any vaccine antigen is whether  
360 the gene that encodes it is essential for parasite growth, as targeting a non-essential gene would seem  
361 likely to select for parasites that do not rely on the gene product, and so are able to escape the vaccine.

362 According to the current model, PvDBP is essential for invasion, as *P. vivax* primarily invades  
363 reticulocytes via the interaction between PvDBP and its host receptor, Duffy Antigen Receptor for  
364 Chemokine (DARC) (17–20). However, it has now clearly been demonstrated that *P. vivax* is also able  
365 to infect individuals who are Duffy negative, lacking DARC expression on their red blood cell surface  
366 (21,22). This could indicate that *P. vivax* is able to utilize other ligands for invasion such as PvRBP2b (28)  
367 and erythrocyte binding protein 2 (ebp2) (30), although it is also possible that PvDBP is still involved in  
368 the invasion of Duffy negative cells (26). It is also worth noting that the genetic essentiality of *PvDBP*  
369 for parasite growth has never been able to be directly tested, as *P. vivax* cannot be cultured and  
370 therefore cannot be genetically manipulated. Studies in *P. knowlesi*, which has three homologues of  
371 *PvDBP*, suggest that at least one is required for invasion of human erythrocytes (47), but whether this  
372 is true of *PvDBP* remains to be proven unequivocally.

373

374 In the case of the four candidates identified by initial screening with wildtype *P. knowlesi*, there are  
375 clear 1:1 orthologues between *P. vivax* and *P. knowlesi*, providing an even stronger rationale than that  
376 of Pv/PkDBP to use *P. knowlesi* genetic tools to explore candidates. We utilised the fact that *P. knowlesi*  
377 can be readily genetically manipulated (46) to explore whether Pv12, Pv41, PvGAMA and PvARP were  
378 essential for parasite growth. *Pk41* and *PkGAMA* could be experimentally deleted, while *Pk12* and  
379 *PkARP* could not, even though both anti-PvP41 and PvP12 antibodies had invasion and growth  
380 inhibitory effects on WT *P. knowlesi*. The fact that *Pk41* and *PkGAMA* could be deleted without any  
381 apparent effect on growth, whereas antibodies that recognise them inhibit growth, seems  
382 contradictory. This could be explained if the antibodies raised against Pv41 and PvGAMA recognized  
383 multiple targets in *P. knowlesi*, but these antibodies had no inhibitory activity when incubated with the  
384 relevant knockout strains, nor could they detect any protein in immunofluorescence assays in these

385 lines. This strongly suggests that the antibodies are specific, and rules out off-target explanations for  
386 the antibody inhibition data. An alternative explanation is that the process of genetic deletion, which  
387 takes some weeks to recover modified parasites, provides an opportunity for the parasites to adapt to  
388 the loss of a specific gene, for example by up-regulating the expression of other genes. By contrast,  
389 growth inhibition assays occur in a single cycle, which the parasites may find it harder to adapt to.  
390 Vaccine-induced antibodies would arguably operate in a similar manner, suggesting that while  
391 essentiality might be one element used to prioritise new targets, it should definitely not be the only  
392 one. Despite this, it would seem reasonable to argue that Pv12 and PvARP should have a higher priority  
393 for follow-up than Pv41 and PvGAMA.

394

395 This study clearly highlights several advantages of the *P. knowlesi* system as a model for testing *P. vivax*  
396 blood-stage antigens, as has been suggested in previous drug (51) and vaccine (46,52) studies. A key  
397 one is accessibility - access to *ex vivo* *P. vivax* samples is limited and samples are precious, whereas we  
398 were readily able to perform multiple *in vitro* assays using *P. knowlesi*. A second is also the genetic  
399 accessibility of the system, where gene deletions and allele replacements, while not precisely routine,  
400 are certainly readily achievable. There are however always limitations in using one species as a model  
401 for another, and this study reveals some of these. The study relies on antibodies that were generated  
402 against *P. vivax* proteins being able to cross-react with their *P. knowlesi* orthologues, and while in  
403 almost all cases this proved possible, there was some correlation between the strength of cross-  
404 reactivity and the % identity between antigen pairs, meaning the *P. knowlesi* model will almost certainly  
405 be more useful for some antigens than others. The genetic tractability of *P. knowlesi* offers a potential  
406 solution to this problem, as we have shown, by allowing the replacement of endogenous *P. knowlesi*  
407 genes with their *P. vivax* orthologues, implying that antibodies can be tested against the precise

408 sequence they were generated against. This approach relies on the ability of a *P. vivax* gene to  
409 substitute for *P. knowlesi* gene function, which may not always be the case, but in all four instances  
410 tested here, as well as the Pv/PkDBP swaps carried out by others (46), this has not proven a problem.  
411 Ultimately however, no model system is perfect, even *in vitro* culture of *P. vivax* itself, which after all is  
412 only a model for *in vivo* growth. It would be extremely useful to the *P. vivax* vaccine field to carry out a  
413 head-to-head comparison across all the four currently available functional models - wildtype *P. knowlesi*,  
414 genetically modified *P. knowlesi* with allele modifications to insert *P. vivax* genes, *P. cynomolgi* and *P.*  
415 *vivax ex vivo* assays. The targets identified here, Pv12, Pv41, PvARP and PvGAMA, along with PvDBP,  
416 present a perfect opportunity to carry out such a test.

417

418 To conclude, using both antibody and genetic approaches, we exploited the phylogenetic relationship  
419 between *P. knowlesi* and *P. vivax* to explore blood-stage *P. vivax* vaccine targets. The data suggests a  
420 hierarchy of possible targets, with Pv12 and PvARP being the highest priority as they are genetically  
421 essential and can be targeted with inhibitory antibodies, Pv41 and PvGAMA in a second tier as they can  
422 be inhibited with antibodies but also genetically deleted, while PvMSP7.1, PvMSP3.10 and PvCyRPA  
423 would seem to have the lowest priority. We have demonstrated that antibodies against *P. vivax* vaccine  
424 targets are able to recognise proteins in *P. knowlesi* as well as inhibit its growth and invasion, and that  
425 *P. knowlesi* has many advantages as a rapid and accessible system to screen *P. vivax* blood stage targets.  
426 These advantages need to be balanced against the limitations described above, and it is always possible  
427 that lack of inhibition and in some case lack of localisation in *P. knowlesi* using anti-*P. vivax* antibodies  
428 is due to the lower level of similarity between *P. vivax* and *P. knowlesi* orthologues, or indeed  
429 differences in biology between these species. Until a robust *P. vivax* culture system is established, which  
430 despite extensive effort by multiple teams (34–38) does not seem likely soon, it will be advisable to

431 use multiple models to screen for candidates, and be clear and upfront about the limitations inherent  
432 in all of them.

## 433 **MATERIALS AND METHODS**

### 434 ***In vitro* parasite culture**

435 *Plasmodium knowlesi* parasites were maintained as described in (41). Briefly, *P. knowlesi* strain A1-H.1  
436 was propagated in human O<sup>+</sup> erythrocytes (UK NHS Blood and Transplant), in RPMI 1640 supplemented  
437 with Albumax (Thermo Fisher Scientific), L-Glutamine (Thermo Fisher Scientific), Horse serum (Thermo  
438 Fisher Scientific), Gentamicin (Thermo Fisher Scientific). The cultures were kept at 2% hematocrit,  
439 gassed using a mixture of 5% CO<sub>2</sub>, 5% O<sub>2</sub> and 90% Nitrogen, while being monitored three times per  
440 week by counting parasitemia using light microscopy with media change or splitting as appropriate.

441

### 442 **Synchronization and enrichment of *Plasmodium knowlesi***

443 Synchronization was performed by enriching late stage parasites using Histodenz (Sigma Aldrich) as  
444 described in (41). Briefly, parasites were resuspended in 5ml complete media and layered on top of 5  
445 ml of 55% Histodenz in complete culture media in a 15 ml tube (Greiner). The mixture was then  
446 centrifuged for 3 minutes at room temperature, 1500 g, acceleration 3 and brake 1, resulting in late  
447 stage parasites becoming enriched at the interface. For inhibition assays, these parasites were returned  
448 to culture, and assays set up after reinvasion had occurred in the subsequent cycle. For protein extracts,  
449 immunofluorescence assays and transfections, this was repeated over three consecutive cell cycles to  
450 create very tightly synchronized parasites, with schizont samples from a fourth cycle of Histodenz  
451 purification used for subsequent analysis.

452

### 453 **Antibody production and purification**

454 Rabbits were immunized with 1mg of his-tagged *P. vivax* full-length ectodomain, expressed in HEK239E  
455 cells as previously described (32), and purified by nickel affinity chromatography. Immunisations were

456 carried out using Freund's complete/incomplete adjuvant by Cambridge Research Biochemicals. Total  
457 IgG was purified using Protein G gravitrap kit (GE healthcare). Eluted total IgG was concentrated by  
458 centrifugation at 4°C for 30 mins using 100000MWCO vivaspin (Sartorius). The concentrate was then  
459 dialyzed using a dialysis tube (Millipore) overnight at 4°C with 1 litre of RPMI 1640 (Thermo Fisher  
460 Scientific), before repeating concentration if necessary. Total IgG concentration was measured  
461 by nanodrop (NanoDrop).

462

### 463 **Protein extraction and Western blotting**

464 To generate protein extracts, schizont stage parasites enriched from 5-10 mL of culture at 5-10%  
465 parasitemia were treated with 0.15% saponin (Sigma Aldrich) and protease inhibitor (Cat. No.  
466 5892970001, Sigma Aldrich) at 1X for 1min on ice to release parasites from their host cell. After pelleting  
467 and two rounds of washing in ice cold 1X PBS (Sigma Aldrich) with protease inhibitor 1X, parasites were  
468 treated with 1 µl of DNase I (Thermoscientific) for 30mins at 37°C., before mixing 1:1 with Laemmli  
469 sample buffer 2X and incubating for 30mins-1h at 37°C to gently denature the sample. The pellet was  
470 then frozen down at -80°C until needed. Samples were diluted 0, 1:5 or 1:10 in Laemmli, and 5µl of the  
471 diluted samples were loaded onto a 4-12% bis-tris NuPage gel (Thermo Fisher Scientific) and run at  
472 200V for 50min in MOPS buffer (Thermo Fisher Scientific). For electrophoresis, 1 µg/µl of samples was  
473 mixed with 2.5 µl NuPage LDS sample buffer (4X) (Thermo Fisher Scientific), 1 µl NuPage Reducing agent  
474 (10X) (Thermo Fisher Scientific) and deionized water to 6.5 µl. The mixture was then incubated at 72°C  
475 for 10 mins while shaking at 300 RPM. 10 µl of the sample was then resolved on a 4-12% bis-trisNuPage  
476 gel (Thermo Fisher Scientific) with 1X MOPS SDS gel buffer (Thermo Fisher Scientific) at 200 V for 50  
477 minutes.

478

479 Western blot transfer was carried out in wet conditions at 30V for 60min, and membrane blocked  
480 overnight while shaking at 4°C in 5% milk (Marvel) containing 0.077% sodium azide (Sigma Aldrich).  
481 Primary antibodies were diluted in 5% milk/PBS/0.1% TWEEN 20 at concentrations as follows: anti-  
482 PvGAMA 1:2400; Pvp12, PvMsp7.1 and PvMSP3.10 1:400; Pvp41, PvARP and PvCyRPA 1:800; PvDBP  
483 1:1600. Primary incubation was carried out overnight at 4°C. Blots were then washed three times, each  
484 10mins, in PBST (1X PBS and 0.1% Tween), before incubating with secondary anti-Rabbit HRP (Abcam)  
485 at 1:20000 dilution in 5% milk/PBS/0.1% for 45 mins at room temperature. Blots were washed again  
486 three times, each 10mins, in PBST before developing with ECL prime Western Blotting detection reagent,  
487 (GE Healthcare). Expected molecular weight of the *P. vivax* candidate proteins and their orthologous  
488 proteins in *P. knowlesi* was predicted using Protein Molecular weight calculator (69) based on the amino  
489 acid sequences of the respective protein sequences from PlasmoDB.

490

#### 491 **Immunofluorescence assays**

492 Cells were synchronized, harvested from culture and enriched using Histodenz as described above  
493 based on (41). These were then washed with 1X PBS (Sigma Aldrich) for 5 mins and fixed with 4%  
494 paraformaldehyde (Agar scientific)/ 0.0075% glutaraldehyde (Sigma Aldrich) in 1X PBS for 30 minutes  
495 at room temperature, followed up with washing in 1x PBS while shaking for 5 mins. Thin smears of fixed  
496 cells were made on Poly-L-Slides (Sigma Aldrich) and stored in -80°C freezer until needed. For  
497 processing, slides were incubated briefly at room temperature, permeabilized with 0.1% Triton X-100  
498 (Sigma Aldrich) in 1X PBS for 30 mins at room temperature then washed once with 1x PBS while shaking  
499 for 5 mins. Blocking was carried out overnight at 4°C in a humidified dark chamber using Blocking Aid  
500 Solution (Thermo Fisher Scientific). Primary antibody diluted in Blocking Aid Solution (Anti-PvGAMA  
501 1:1200; Pvp12, PvMsp7.1 and PvMSP3.10 1:200; PvARP 1:400; PvCyRPA and PvDBP 1:800; Pvp41 1:200,



502 PkMSP1-19 1:2000; PfAMA1 1:1000) was then added and incubated overnight in a humidified dark  
503 chamber at 4°C followed by washing three times for 5 mins in 1X PBS while shaking. Secondary antibody  
504 diluted in Blocking Aid Solution (Alexa Fluor 555 Goat-anti rabbit (Thermo Fisher Scientific) (1:500) for  
505 anti-*P. vivax* rabbit polyclonals and Alexa Fluor 488 Goat-anti rat (Thermo Fisher Scientific) (1:500) for  
506 PkMSP1-19 and PfAMA1) was then added and incubated 1 hour in a humidified dark chamber at room  
507 temperature followed by washing three times for 5 mins in 1X PBS while shaking. Hoechst 33342  
508 (Thermo Fisher Scientific), for nucleus staining, was diluted 1:3000 in 1x PBS (Sigma Aldrich) then added  
509 and incubated for 10 mins in a humidified dark chamber at room temperature with subsequently  
510 washing three times for 5 mins in 1X PBS while shaking. The cells were later mounted with Pro-Long  
511 Gold mounting solution (Thermo Fisher Scientific), covered with cover-glass (VWR), left to cure for 24  
512 hours in dark and dry chamber at room temperature and eventually sealed with slide sealer (Biotium),  
513 before imaging on a Leica DMI8.

514

### 515 **Invasion and growth inhibition assays**

516 Two milli-litres of O+ erythrocytes at 2% hematocrit in incomplete-culture media were labelled using 2  
517 µl of a stock of 1 mM Far-red Cell Trace (Thermo Fisher Scientific); control unstained erythrocytes were  
518 incubated with 2 µl of Dimethyl-sulphoxide (DMSO; Sigma Aldrich). After 2 hours of incubation at 37°C  
519 while shaking, labelled erythrocytes were washed twice using complete media, then the cells were  
520 resuspended in complete media to 2% hematocrit in 2 ml final volume. Labelled erythrocytes were  
521 mixed with synchronized rings, generated by enriching schizonts as described above then returning  
522 them to culture until reinvasion had occurred. The labelled erythrocyte-parasite mix was incubated  
523 with serial dilutions of anti-*P. vivax* antibodies, with all dilutions made using incomplete medium.  
524 Incubations were carried out in 96-well plates, with each well containing 20 µl infected erythrocytes,

525 20  $\mu$ l stained erythrocytes, X $\mu$ l of diluted total IgG (X $\mu$ l because the antibodies were in varying stock  
526 concentrations therefore requiring different volumes to be added to get the same final concentration),  
527 and 2.2  $\mu$ l of a mixture of serum, hypoxanthine and gentamicin (at a ratio of 2, 0.18 and 0.009  
528 respectively). Control wells contained 40  $\mu$ l of erythrocytes only, or 20  $\mu$ l of infected erythrocytes/20  $\mu$ l  
529 of unstained erythrocytes, or 40  $\mu$ l of stained erythrocytes only, or 20  $\mu$ l of infected erythrocytes and  
530 20  $\mu$ l of stained erythrocytes, to control for gating in the flow cytometry. Triplicates of each combination  
531 were incubated in a 96 well plate for 24 hours in a gassed chamber. To quantify parasite invasion or  
532 growth, samples were centrifuged for 3 mins at 450g (acceleration 9, brake 3) at room temperature,  
533 supernatant was removed and samples were labelled with SYBR green I nucleic acid dye (Thermo Fisher  
534 Scientific) for 1 hour at 37°C while shaking at 52 rpm. After two washes with 100  $\mu$ l 1 X PBS (Sigma  
535 Aldrich), samples were resuspended in 100  $\mu$ l of 1 X PBS (Sigma Aldrich) and parasites quantified using  
536 FACS (Cytoflex, Becton and coulter) as previously described (70). Data was analyzed using FlowJo  
537 (FlowJo) then using Excel (Microsoft office), invasion was calculated as the percentage of erythrocytes  
538 that were both SYBR green and Far-red Cell Trace positive as compared to only DMSO treated  
539 erythrocytes while growth was calculated as the percentage of cells that were only SYBR green positive  
540 as compared to only DMSO treated erythrocytes. The results were then plotted using the following R  
541 packages; ggplot2 (71), ggpubr (72), cowplot (73), magrittr (74), readxl (75) and dplyr (76) in R-Studio  
542 (R-Studio Inc). IC<sub>50</sub> was determined using Probit/logit regression using Excel (Microsoft office).

543

#### 544 **Genetic modification**

545 **Gene repair construct design and assembly:** Constructs, guide RNAs and primers (supplementary table  
546 S1,2,4,5,6) were designed with (77) and (78). Synthetic DNA codon optimization was performed using  
547 gblocks® Gene Fragments (IDT) (PvGAMA\_regions1 & 3, PvARP\_region1) and GeneArt Gene Synthesis

548 (Thermo Fischer Scientific) (Pv12, Pv41, PvARP\_region3). PvGAMA\_regions2 and PvARP\_regions3 were  
549 amplified from expression constructs previously generated by (32). Other fragments were amplified  
550 from *P. knowlesi* genomic DNA, purified from saponin-lysed *P. knowlesi* infected erythrocytes using  
551 DNA blood kit (Qiagen) according to the manufacturer's protocol. Gene editing donor vectors were  
552 assembled in PUC19 using Gibson assembly according to the manufacturer's protocol (NEB), using PCR  
553 products amplified using KAPA HiFi HotStart ReadyMixPCR Kit (KAPABiosystems) and purified using gel  
554 isolation kits (Macherey and Nagel). Primers (Supplementary Tables S1 and S2) and PCR programs  
555 (Supplementary Table S3: KAPA2M for all of constructs except KAP121M for final amplification of  
556 *Pkgama* replacement insert) are listed in the Supplementary Material.

557

558 **Assembly of Cas9/gRNA vectors:** The cloning vector (TGL96) was digested using BtgZI (NEB), purified  
559 using a gel purification kit (Macherey and Nagel), and treated with shrimp alkaline phosphatase (NEB)  
560 to dephosphorylate vector ends. Guide RNAs (Supplementary Table S5) were reconstituted by mixing 1  
561  $\mu$ l of 100  $\mu$ M stocks of the forward and reverse strands for each guide with 1  $\mu$ l of 10x ligation buffer  
562 (NEB), 0.5  $\mu$ l T4 polynucleotide kinase (NEB) and 65  $\mu$ l nuclease free PCR water. Annealing was carried  
563 out by incubating at 37°C for 30 min, then increasing to 94°C for 5 min before cooling at 25°C at a ramp  
564 speed of 5°C per-min. Annealed primers were then diluted to 1  $\mu$ l in 200  $\mu$ l and ligated (NEB) to the  
565 digested and dephosphorylated Cas9 vector.

566

567 Vectors were transformed into chemically competent *E. coli* according to the manufacturer's protocol  
568 (NEB), and grown overnight. Resulting colonies were screened by colony PCR using GoTaq Green PCR  
569 master mix (Promega), with 1  $\mu$ l of Pk5' UTR forward and Pk3'UTR reverse primers for each respective  
570 construct. Positive colonies were expanded and DNA purified using a miniprep purification kit

571 (Macherey and Nagel) and sequenced to confirm construct integrity (GATC/Eurofins). Sequencing data  
572 was analyzed using Benchling (77) and Seqman Pro (DNA star Navigator); positive constructs were  
573 expanded and purified for transfection using a maxiprep purification kit (Macherey and Nagel).

574

#### 575 **Transfection**

576 Transfection was performed largely as described in (41). Late stage *P. knowlesi* parasites were enriched  
577 using Histodenz as described above. In each transfection cuvette (Lonza), 10 µl of schizonts was mixed  
578 with 100 µl of P3 solution (Lonza) containing 30 µg each of the relevant donor and guide vectors.  
579 Transfections were carried out using program FP158 (Amaya Nucleofector, Lonza), and the contents  
580 were then immediately transferred into a 2 ml sterile eppendorf tube containing 500 µl of complete  
581 culture media mixed with 190 µl uninfected erythrocytes. The transfection mix was incubated at 37°C  
582 while shaking at 800 rpm in a thermomixer for 30mins, before being transferred into a 6 well plate,  
583 gassed and incubated at 37°C for one parasite life cycle. After this selection was applied with 100 nM  
584 pyrimethamine (Santa Cruz Biotechnology Inc). For three days, the cultures were monitored by  
585 smearing and selection done by changing the media and replacing with fresh media containing 100 nM  
586 pyrimethamine (Santa Cruz Biotechnology Inc). On day 4 post transfection the cultures were diluted  
587 1/3 in 5ml fresh media containing 100 nM pyrimethamine and 100 µl erythrocytes. The cultures were  
588 then maintained and monitored after every 2nd cycle by smearing/parasitemia counting, with media  
589 changed or cultures split as appropriate. Samples where parasites re-appeared were expanded in a total  
590 volume of 50 ml with erythrocytes at 2% hematocrit until parasitemia was greater than 5%. DNA was  
591 then isolated using a DNA Blood kit (Qiagen) and analysed using gene-specific primers (Supplementary  
592 Table S6) and PCR program KAPA18C (Supplementary Table S3). Cultures that contained only modified  
593 parasites were phenotyped without cloning, while those that genotyping showed had both modified

594 and WT genotyping bands were cloned by limiting dilution and plaque cloning in flat-bottomed 96-well  
595 plates . Wells containing single plaques were identified using an EVOS microscope (4x objective,  
596 transmitted light), expanded, and DNA isolated and genotyped as described above as well as whole  
597 genome sequenced WGS analysis was then performed on the Wellcome Sanger Cluster using bowtie2  
598 (79), samtools (80). Visualisation was performed using Integrative Genomics Viewer (81–83) as described  
599 in Pevner (84) <sup>2</sup>.

600

## 601 **Ethics**

602 Human O+ erythrocytes were purchased from NHS Blood and Transplant, Cambridge, UK, and all  
603 samples were anonymised. The work complied with all relevant ethical regulations for work with human  
604 participants. The use of erythrocytes from human donors for *P. falciparum* culture and binding studies  
605 was approved by the NHS Cambridgeshire 4 Research Ethics Committee (REC reference 15/EE/0253)  
606 and the Wellcome Sanger Institute Human Materials and Data Management Committee.

607

## 608 **ACKNOWLEDGEMENTS**

609 We wish to acknowledge the following for their various contributions: Ellen Knuepfer for the kind  
610 donation of Rat anti-PkMSP1-19 serum. Rob Moon and Franziska Mohring for the kind donation of Pk  
611 CRISPR-Cas9, guide and donor vectors, and advice on genetic modification, Mehdi Ghorbal for advice  
612 on construct design, cloning and genetic manipulation experiments and Allan Muhwezi for advice on  
613 cell culture.

614

615 Funding was provided by the National Institutes of Health (R01AI137154), European Union (MultiViVax  
616 773073) and the Wellcome Trust (206194/Z/17/Z). The funders had no role in study design, data  
617 collection and analysis, decision to publish or preparation of the manuscript.

618

619 The views expressed in this article are those of the authors and do not necessarily represent the views  
620 of the National Heart, Lung and Blood Institute, the National Institutes of Health, the United States  
621 Department of Health and Human Services, or any other government entity.

622 **FIGURE LEGENDS**

623 **Figure 1. Anti-*P. vivax* polyclonal antibodies recognise proteins in *P. knowlesi* schizont protein lysates.**

624 Protein extracts from enriched *P. knowlesi* cultures at schizont stage were blotted with various anti-*P.*  
625 *Vivax* polyclonal antibodies individually and detected using ECL prime Western Blotting detection  
626 reagent, (GE Healthcare). On the left is a molecular marker in kilodalton (Kda). Obtained size (the lower  
627 row) correspond to the major bands seen. This is compared to the expected size of the corresponding  
628 protein in *P. knowlesi* (upper row) and its orthologue in *P. vivax* (middle row). The arrows indicate the  
629 major bands for PvMSP3.10, PVMSP7.1 and PvCyRPA. Note that the expected size of PkMSP7.1 of 39Kda  
630 is an average of the molecular weight of four PkMSP7 like proteins (i.e. PKNH\_1265900, PKNH\_1266000,  
631 PKNH\_1266100, PKNH\_1266300) that range from 32 - 46 Kda.

632

633 **Figure 2. Immunolocalisation of *P. knowlesi* proteins using polyclonal anti-*P. vivax* antibodies.** *P.*

634 *knowlesi* homologs of *P. vivax* vaccine candidates were localised using *P. vivax* polyclonal antibodies  
635 and Alexa Fluor 555 Goat-anti rabbit (Thermo Fisher Scientific) as the secondary antibody. Localisation  
636 of PkGAMA, PkDBP, PkARP, PkCyRPA, PkMSP7.1, Pkp41 and Pkp12 was performed using antibodies  
637 against PvGAMA, PvDBP, PvARP, PvCyRPA, PvMSP7.1, Pv41 and Pv12, respectively. Parasite nuclei were  
638 stained with Hoechst 33342 (Thermo Fisher Scientific). Merge is an overlay of Alexa 555 and Hoeschst.  
639 Scale bar is 2 micrometers.

640

641 **Figure 3. Colocalisation of *P. knowlesi* homologs of *P. vivax* vaccine candidates with antibodies to**

642 **proteins of known cellular location.** *P. knowlesi* proteins were localised using *P. vivax* polyclonal  
643 antibodies and compared with A. anti-PkMSP1 or B. anti-PfAMA1 for colocalisation. In both A. and B. ,  
644 Alexa Fluor 555 Goat-anti rabbit and Alexa Fluor 488 Goat-anti rat (Thermo Fisher Scientific) were used

645 as secondary antibodies. Parasite DNA was localised using Hoechst 33342 (Thermo Fisher Scientific).  
646 Merge one is an overlay of Alexa 555 and Alexa488, while Merge two is an overlay of Alexa 555,  
647 Alexa488 and Hoeschst. Imaging was done using fluorescence microscopy. Scale bar is 2 micrometers.

648

649 **Figure 4. Invasion and growth inhibition of *P. knowlesi* by polyclonal antibodies to *P. vivax* vaccine**  
650 **candidates.** Synchronized *P. knowlesi* cultures at ring stage were mixed with Far-red Cell Trace dye  
651 treated erythrocytes and DMSO treated erythrocytes. These were then treated with two-fold serial  
652 dilutions from 10 mg/ml to 0.625 mg/ml of purified total IgG. Cell numbers were quantified with a flow  
653 cytometer using SYBR green after 24 hours. Invasion inhibition was calculated as SYBR green and Far-  
654 red Cell Trace positive events while growth was calculated as percentage of SYBR green only positive  
655 events. Percentage inhibition of invasion (yellow) and growth (blue) of *P. knowlesi* grown in the  
656 presence of antibodies was compared to *P. knowlesi* growth in parallel in the absence of antibodies.  
657 Heparin and Rabbit IgG from unimmunized animals were used as positive and negative controls  
658 respectively.

659

660 **Figure 5. Gene editing can delete PkP41 and PkGAMA in *P. knowlesi*.** Pkp41 and PkGAMA were  
661 replaced with eGFP to generate Pk41KO and PkGAMAKO strains respectively. A. Flow cytometry to  
662 establish eGFP expression in knockout lines. Enriched knock out and wild-type *P. knowlesi* cultures at  
663 late stages were treated using SYBR green in 1X PBS and incubated for one hour after which they were  
664 quantified by flow cytometry. Events were gated as both SYBR green and GFP negative (Lower left),  
665 SYBR green only positive (Lower right) and both SYBR green and GFP positive (upper). B. eGFP  
666 expression in knock-out *P. knowlesi* strains as compared to wild-type *P. knowlesi*, imaged using  
667 fluorescence microscopy. Parasite nuclei were stained using Hoechst 33342 (Thermo Fisher Scientific).



668 Merge is an overlay of Alexa 555 and Hoeschst. Scale bar is 2 micrometers. C. Proteins in knock out and  
669 wild-type *P. knowlesi* strains were localised using *P. vivax* polyclonal antibodies and Alexa Fluor 555  
670 Goat-anti rabbit (Thermo Fisher Scientific) as secondary antibody then imaged using fluorescence  
671 microscopy. Localisation in both knock out and wild-type Pv41 and PvGAMA was performed using anti-  
672 Pv41 and anti-PvGAMA antibodies respectively. Parasite nuclei were stained with Hoechst 33342  
673 (Thermo Fisher Scientific). Merge is an overlay of Alexa 555 and Hoeschst. Scale bar is 2 micrometers.

674

675 **Figure 6. Knockout of *P. knowlesi* genes eliminates inhibition by polyclonal antibodies to homologous**  
676 ***P. vivax* vaccine candidates.** Synchronized *P. knowlesi* knockout cultures at ring stage were mixed with  
677 Far-red Cell Trace dye treated erythrocytes and DMSO treated erythrocytes. These were then treated  
678 with two-fold serial dilutions from 10 mg/ml to 0.625 mg/ml of either Heparin, purified anti-*P. vivax*  
679 total IgG or commercial Rabbit IgG. Cell numbers were quantified by a flow cytometry using SYBR green  
680 after 24 hours. Invasion inhibition was calculated as SYBR green and Far-red Cell Trace positive events  
681 while growth was calculated as the percentage of SYBR green only positive events. Percentage invasion  
682 inhibition of PkGAMAKO and Pk41KO strains treated with Heparin (blue), purified anti-*P. vivax* total IgG  
683 (yellow) or commercial Rabbit IgG (grey) compared to untreated *P. knowlesi*. Heparin and commercial  
684 Rabbit IgG from unimmunized animals were used as positive and negative controls respectively.  
685 Percentage inhibition of *P. knowlesi* under a background of Pk41 and PkGAMA knock out treated with  
686 f anti-Pvp41 and anti-PvGAMA antibodies respectively.

687

688 **Figure 7. Gene editing to replace *P. knowlesi* target genes with orthologous *P. vivax* candidate genes.**  
689 Pvp12, PvARP, Ppv41 and PvGAMA gene sequences were used to replace Pkp12, PkARP, Pkp41 and  
690 PkGAMA in wild-type *P. knowlesi* to create lines Pk12Rep, PkARPrep, Pk41Rep and PkGAMAREp

691 respectively. Proteins in chimeric and wild-type *P. knowlesi* strains were localised using *P. vivax*  
692 polyclonal antibodies and Alexa Fluor 555 Goat-anti rabbit (Thermo Fisher Scientific) as secondary  
693 antibody and imaged using fluorescence microscopy. Localisation of both chimeric proteins Pv12,  
694 PvARP, Pv41 and PvGAMA (Pk12Rep, PkARPrep, Pk41Rep and PkGAMAREp respectively) and wild-type  
695 proteins Pkp12, PvARP, Pkp41 and PvGAMA (Pk12WT, PkARPWT, Pk41WT and PkGAMAWT respectively)  
696 was performed using anti-Pv12, anti-PvARP, anti-Pv41 and anti-PvGAMA antibodies, respectively.  
697 Parasite nuclei were stained with Hoechst 33342 (Thermo Fisher Scientific). Merge is an overlay of  
698 Alexa 555 and Hoeschst. Scale bar is 2 micrometers.

699

700 **Figure 8. Inhibition of chimeric *P. knowlesi* expressing *P. vivax* proteins by polyclonal antibodies to *P.***

701 ***vivax* vaccine candidates is increased in chimeric *P. knowlesi* strains expressing *P. vivax* proteins.**

702 Synchronized wild-type and chimeric *P. knowlesi* strains' cultures at ring stage were mixed with Far-red

703 Cell Trace dye treated erythrocytes and DMSO treated erythrocytes. These were then treated with two-

704 fold serial dilutions from 10 mg/ml to 0.625 mg/ml of anti-*P. vivax* total IgG. Cell numbers were

705 quantified by flow cytometry using SYBR green after 24 hours. Invasion inhibition was calculated as

706 SYBR green and Far-red Cell Trace positive events while growth was calculated as percentage of SYBR

707 green only positive events. Percentage invasion inhibition of chimeric *P. knowlesi* (blue) expressing

708 Pvp12 (Pkp12Replacement), PvARP (PkARPreplacement), Pvp41 (Pkp41Replacement) and PvGAMA

709 (PkGamaReplacement) treated with anti-Pvp12, anti-PvARP, anti-Pvp41 and anti-PvGAMA antibodies

710 respectively compared to *P. knowlesi* WT (yellow).

711

712 **Supporting information**

713 **S1 Supplementary figure 1. Preimmune antibody controls for immunolocalization.** Localisation of  
714 PkGAMA, PkDBP, PkARP, PkCyRPA, PkMSP7.1, Pk41 and Pk12 using pre-immune serum from rabbits  
715 immunized with PvGAMA, PvDBP, PvARP, PvCyRPA, PvMSP7.1, Pv41 and Pv12, respectively. Scale bar  
716 is 2 micrometers.

717 **S2 Supplementary figure 2. Colocalization of *P. knowlesi* proteins using polyclonal anti-*P. vivax***  
718 **antibodies to *P. vivax* vaccine candidates with antibodies to proteins of known cellular location.**  
719 Colocalization of Pk12, PkMSP7.1, Pk41 with A. PkMSP1-19 and B. PkGap45 using antibodies to Pv12,  
720 PvMSP7.1, Pv41, PkMSP1 and PfGap45, respectively. Scale bar is 2 micrometers.

721  
722 **S3 Supplementary figure 3. Colocalization of *P. knowlesi* proteins using polyclonal anti-*P. vivax***  
723 **antibodies to *P. vivax* vaccine candidates with antibodies to proteins of known cellular location.**  
724 Colocalization of PkGAMA, PkCyRPA, PkDBP, PkARP, Pk12, PkMSP7.1, Pk41 with **A)** PkMSP-1-19 and **B)**  
725 PkAMA1 using anti-bodies to PvGAMA, PvCyRPA, PvDBP, PvARP, Pv12, PvMSP7.1, Pv41, PkMSP1 and  
726 PfAMA1, respectively. Scale bar is 2 micrometers.

727  
728 **S4 Supplementary figure 4. Gene editing strategy to knock out candidate genes.** A) General strategy  
729 used to knock out *Pk12*, *Pkarp*, *Pkdbpalpha*, *Pk41* and *Pkgama*. Plasmids used are Cas9/gRNA vector  
730 and donor vector containing eGFP (GFP) flanked with 5' and 3' untranslated region (UTR) for each  
731 respective *P. knowlesi* gene (PkCDS). Primer pairs used for genotyping are P1&P2 and P3&P4, to test  
732 for wildtype, P1&P5 and P6&P4 to test for integration of the knockout construct. B) Genotyping of  
733 Pk41KO and PkGAMAKO with above primer pairs as compared to WT. On the right side are the obtained  
734 molecular weight in kilobase pairs (kb).

735

736 **S5 Supplementary figure 5. Whole genome sequencing of Pk41 knockout strain.** Alignment of p41  
737 knockout strains to *P. knowlesi* reference genome and the WT strain from which they were generated .

738

739 **S6 Supplementary figure 6. Whole genome sequencing of PkGAMA knockout strain.** Alignment of  
740 GAMA knockout strains to *P. knowlesi* reference genome and the WT strain from which they were  
741 generated.

742

743 **S7 Supplementary figure 7. Gene editing strategy to replace *P. knowlesi* target genes with  
744 orthologous *P. vivax* candidate genes.** A) General strategy used to replace *pk12*, *pkarp*, *pk41* and  
745 *pkgama* with *pv12*, *pvarp*, *pv41* and *pvgama*, respectively. Plasmids used are Cas9/gRNA vector and  
746 donor vector containing the *P. vivax* coding sequence (PvCDS) flanked with 5' and 3' untranslated region  
747 (UTR) for each respective *P. knowlesi* gene (PkCDS). Primer pairs used for genotyping are P1&P2 and  
748 P3&P4, to test for WT. P1&P5 and P6&P4 to test for integration of the replacement construct. B)  
749 Genotyping of *pk12*, *pkarp*, *pk41* and *pkgama* allele replacement (Rep) using the above primer pairs as  
750 compared to WT. On the right side are the obtained molecular weight in kilobase pairs (kb).

751

752 **S8 Supplementary figure 8. Whole genome sequencing of Pk41-Pv41 replacement strain.** Alignment  
753 of p41 allele replacement strains to *P. knowlesi* reference genome and the WT strain from which they  
754 were generated.

755

756 **S9 Supplementary figure 9. Whole genome sequencing of PkGAMA-PvGAMA replacement strain.**  
757 Alignment of GAMA allele replacement strains to *P. knowlesi* i reference genome and the WT strain  
758 from which they were generated.

759

760 **S10 Supplementary figure 10. Whole genome sequencing of PkARP-PvARP replacement strain.**

761 Alignment of ARP allele replacement strains to *P. knowlesi* i reference genome and the WT strain from  
762 which they were generated.

763

764 **S11 Supplementary figure 11. Whole genome sequencing of Pk12-Pv12 replacement strain.** Alignment

765 of p12 allele replacement strains to *P. knowlesi* i reference genome and the WT strain from which they  
766 were generated.

767

768 **S12 Supplementary figure 12. Comparative Growth rate assay between wildtype *P. knowlesi* and**

769 **genetically edited *P. knowlesi* strains.** WT (*P. knowlesi* WT), Gamako (PkGama knock-out clone),  
770 Gamarep (PkGama replacement clone), p41ko (Pkp41 knock out clone), p41rep (Pkp41 replacement  
771 clone), P12rep (Pkp12 replacement clone), ARPrep (PkARP replacement clone).

772

773

774

775

776 **REFERENCES**

1. World Health Organization. World Malaria ReportT 2019. S.l.: World Health Organization; 2019.
2. Beutler E. The Hemolytic Effect of Primaquine and Related Compounds: a Review. *Blood*. 1959 Feb 1;14(2):103–39.
3. Chu CS, Bancone G, Moore KA, Win HH, Thitipanawan N, Po C, et al. Haemolysis in G6PD Heterozygous Females Treated with Primaquine for Plasmodium vivax Malaria: A Nested Cohort in a Trial of Radical Curative Regimens. Garner P, editor. *PLOS Med*. 2017 Feb 7;14(2):e1002224.
4. Galinski MR, Meyer EVS, Barnwell JW. Chapter One - Plasmodium vivax: Modern Strategies to Study a Persistent Parasite's Life Cycle. In: Hay SI, Price R, Baird JK, editors. *Advances in Parasitology* [Internet]. Academic Press; 2013 [cited 2020 Jul 30]. p. 1–26. (The Epidemiology of Plasmodium vivax; vol. 81). Available from: <http://www.sciencedirect.com/science/article/pii/B978012407826000011>
5. Wampfler R, Hofmann NE, Karl S, Betuela I, Kinboro B, Lorry L, et al. Effects of liver-stage clearance by Primaquine on gametocyte carriage of Plasmodium vivax and P. falciparum. *PLoS Negl Trop Dis*. 2017 Jul 21;11(7):e0005753.
6. Barry AE, Arnott A. Strategies for designing and monitoring malaria vaccines targeting diverse antigens. *Front Immunol*. 2014;5:359.
7. Mueller I, Shakri AR, Chitnis CE. Development of vaccines for Plasmodium vivax malaria. *Vaccine*. 2015 Dec;33(52):7489–95.
8. Bouillet LÉM, Dias MO, Dorigo NA, Moura AD, Russell B, Nosten F, et al. Long-term humoral and cellular immune responses elicited by a heterologous Plasmodium vivax apical membrane antigen 1 protein prime/adenovirus boost immunization protocol. *Infect Immun*. 2011 Sep;79(9):3642–52.
9. Vicentin EC, Françoso KS, Rocha MV, Iourtov D, Dos Santos FL, Kubrusly FS, et al. Invasion-inhibitory antibodies elicited by immunization with Plasmodium vivax apical membrane antigen-1 expressed in Pichia pastoris yeast. *Infect Immun*. 2014 Mar;82(3):1296–307.
10. Rosa DS, Iwai LK, Tzelepis F, Bargieri DY, Medeiros MA, Soares IS, et al. Immunogenicity of a recombinant protein containing the Plasmodium vivax vaccine candidate MSP1(19) and two human CD4+ T-cell epitopes administered to non-human primates (Callithrix jacchus jacchus). *Microbes Infect*. 2006 Jul;8(8):2130–7.
11. Devi YS, Mukherjee P, Yazdani SS, Shakri AR, Mazumdar S, Pandey S, et al. Immunogenicity of Plasmodium vivax combination subunit vaccine formulated with human compatible adjuvants in mice. *Vaccine*. 2007 Jul 9;25(28):5166–74.
12. Payne RO, Silk SE, Elias SC, Milne KH, Rawlinson TA, Llewellyn D, et al. Human vaccination against

- Plasmodium vivax Duffy-binding protein induces strain-transcending antibodies. *JCI Insight*. 2017 Jun 15;2(12):e93683.
13. Wiley SR, Raman VS, Desbien A, Bailor HR, Bhardwaj R, Shakri AR, et al. Targeting TLRs expands the antibody repertoire in response to a malaria vaccine. *Sci Transl Med*. 2011 Jul 27;3(93):93ra69.
  14. Moreno A, Caro-Aguilar I, Yazdani SS, Shakri AR, Lapp S, Strobert E, et al. Preclinical assessment of the receptor-binding domain of Plasmodium vivax Duffy-binding protein as a vaccine candidate in rhesus macaques. *Vaccine*. 2008 Aug;26(34):4338–44.
  15. de Cassan SC, Shakri AR, Llewellyn D, Elias SC, Cho JS, Goodman AL, et al. Preclinical Assessment of Viral Vectored and Protein Vaccines Targeting the Duffy-Binding Protein Region II of Plasmodium Vivax. *Front Immunol* [Internet]. 2015 Jul 8 [cited 2020 Jul 30];6. Available from: <http://journal.frontiersin.org/Article/10.3389/fimmu.2015.00348/abstract>
  16. RTS,S Clinical Trials Partnership. Efficacy and safety of RTS,S/AS01 malaria vaccine with or without a booster dose in infants and children in Africa: final results of a phase 3, individually randomised, controlled trial. *Lancet Lond Engl*. 2015 Jul 4;386(9988):31–45.
  17. Miller LH, Mason SJ, Dvorak JA, McGinniss MH, Rothman IK. Erythrocyte receptors for (Plasmodium knowlesi) malaria: Duffy blood group determinants. *Science*. 1975 Aug 15;189(4202):561–3.
  18. Barnwell JW, Nichols ME, Rubinstein P. In vitro evaluation of the role of the Duffy blood group in erythrocyte invasion by Plasmodium vivax. *J Exp Med*. 1989 May 1;169(5):1795–802.
  19. Wertheimer SP, Barnwell JW. Plasmodium vivax interaction with the human Duffy blood group glycoprotein: identification of a parasite receptor-like protein. *Exp Parasitol*. 1989 Nov;69(4):340–50.
  20. Chitnis CE, Chaudhuri A, Horuk R, Pogo AO, Miller LH. The domain on the Duffy blood group antigen for binding Plasmodium vivax and P. knowlesi malarial parasites to erythrocytes. *J Exp Med*. 1996 Oct 1;184(4):1531–6.
  21. Menard D, Barnadas C, Bouchier C, Henry-Halldin C, Gray LR, Ratsimbao A, et al. Plasmodium vivax clinical malaria is commonly observed in Duffy-negative Malagasy people. *Proc Natl Acad Sci*. 2010 Mar 30;107(13):5967–71.
  22. Mendes C, Dias F, Figueiredo J, Mora VG, Cano J, de Sousa B, et al. Duffy Negative Antigen Is No Longer a Barrier to Plasmodium vivax – Molecular Evidences from the African West Coast (Angola and Equatorial Guinea). Franco-Paredes C, editor. *PLoS Negl Trop Dis*. 2011 Jun 21;5(6):e1192.
  23. Zimmerman PA, Ferreira MU, Howes RE, Mercereau-Puijalon O. Red blood cell polymorphism and susceptibility to Plasmodium vivax. *Adv Parasitol*. 2013;81:27–76.
  24. Twohig KA, Pfeiffer DA, Baird JK, Price RN, Zimmerman PA, Hay SI, et al. Growing evidence of

- Plasmodium vivax across malaria-endemic Africa. PLoS Negl Trop Dis. 2019;13(1):e0007140.
25. Gunalan K, Niangaly A, Thera MA, Doumbo OK, Miller LH. Plasmodium vivax Infections of Duffy-Negative Erythrocytes: Historically Undetected or a Recent Adaptation? Trends Parasitol. 2018 May;34(5):420–9.
  26. Lo E, Hostetler JB, Yewhalaw D, Pearson RD, Hamid MMA, Gunalan K, et al. Frequent expansion of Plasmodium vivax Duffy Binding Protein in Ethiopia and its epidemiological significance. Sillis P, editor. PLoS Negl Trop Dis. 2019 Sep 11;13(9):e0007222.
  27. Cowman AF, Tonkin CJ, Tham W-H, Duraisingh MT. The Molecular Basis of Erythrocyte Invasion by Malaria Parasites. Cell Host Microbe. 2017 Aug 9;22(2):232–45.
  28. Gruszczuk J, Kanjee U, Chan L-J, Menant S, Malleret B, Lim NTY, et al. Transferrin receptor 1 is a reticulocyte-specific receptor for Plasmodium vivax. Science. 2018 05;359(6371):48–55.
  29. Cheng Y, Lu F, Wang B, Li J, Han J-H, Ito D, et al. Plasmodium vivax GPI-anchored micronemal antigen (PvGAMA) binds human erythrocytes independent of Duffy antigen status. Sci Rep. 2016 Dec;6(1):35581.
  30. Ntumngia FB, Thomson-Luque R, Torres L de M, Gunalan K, Carvalho LH, Adams JH. A Novel Erythrocyte Binding Protein of Plasmodium vivax Suggests an Alternate Invasion Pathway into Duffy-Positive Reticulocytes. mBio. 2016 Sep 7;7(4):e01261-16, /mbio/7/4/e01261-16.atom.
  31. Bustamante LY, Powell GT, Lin Y-C, Macklin MD, Cross N, Kemp A, et al. Synergistic malaria vaccine combinations identified by systematic antigen screening. Proc Natl Acad Sci U S A. 2017 07;114(45):12045–50.
  32. Hostetler JB, Sharma S, Bartholdson SJ, Wright GJ, Fairhurst RM, Rayner JC. A Library of Plasmodium vivax Recombinant Merozoite Proteins Reveals New Vaccine Candidates and Protein-Protein Interactions. Barry AE, editor. PLoS Negl Trop Dis. 2015 Dec 23;9(12):e0004264.
  33. Malleret B, Li A, Zhang R, Tan KSW, Suwanarusk R, Claser C, et al. Plasmodium vivax: restricted tropism and rapid remodeling of CD71-positive reticulocytes. Blood. 2015 Feb 19;125(8):1314–24.
  34. Golenda CF, Li J, Rosenberg R. Continuous in vitro propagation of the malaria parasite Plasmodium vivax. Proc Natl Acad Sci U S A. 1997 Jun 24;94(13):6786–91.
  35. Udomsangpetch R, Somsri S, Panichakul T, Chotivanich K, Sirichaisinthop J, Yang Z, et al. Short-term in vitro culture of field isolates of Plasmodium vivax using umbilical cord blood. Parasitol Int. 2007 Mar;56(1):65–9.
  36. Udomsangpetch R, Kaneko O, Chotivanich K, Sattabongkot J. Cultivation of Plasmodium vivax. Trends Parasitol. 2008 Feb;24(2):85–8.
  37. Panichakul T, Sattabongkot J, Chotivanich K, Sirichaisinthop J, Cui L, Udomsangpetch R. Production of erythropoietic cells in vitro for continuous culture of Plasmodium vivax. Int J



Parasitol. 2007 Dec;37(14):1551–7.

38. Scully EJ, Shabani E, Rangel GW, Grüning C, Kanjee U, Clark MA, et al. Generation of an immortalized erythroid progenitor cell line from peripheral blood: A model system for the functional analysis of Plasmodium spp. invasion. *Am J Hematol*. 2019;94(9):963–74.
39. Carlton JM, Adams JH, Silva JC, Bidwell SL, Lorenzi H, Caler E, et al. Comparative genomics of the neglected human malaria parasite Plasmodium vivax. *Nature*. 2008 Oct 9;455(7214):757–63.
40. Rutledge GG, Böhme U, Sanders M, Reid AJ, Cotton JA, Maiga-Ascofare O, et al. Plasmodium malariae and P. ovale genomes provide insights into malaria parasite evolution. *Nature*. 2017 02;542(7639):101–4.
41. Moon RW, Hall J, Rangkuti F, Ho YS, Almond N, Mitchell GH, et al. Adaptation of the genetically tractable malaria pathogen Plasmodium knowlesi to continuous culture in human erythrocytes. *Proc Natl Acad Sci U S A*. 2013 Jan 8;110(2):531–6.
42. Shaw-Saliba K, Thomson-Luque R, Obaldía N, Nuñez M, Dutary S, Lim C, et al. Insights into an Optimization of Plasmodium vivax Sal-1 In Vitro Culture: The Aotus Primate Model. Sinnis P, editor. *PLoS Negl Trop Dis*. 2016 Jul 27;10(7):e0004870.
43. Crosnier C, Wanaguru M, McDade B, Osier FH, Marsh K, Rayner JC, et al. A library of functional recombinant cell-surface and secreted P. falciparum merozoite proteins. *Mol Cell Proteomics MCP*. 2013 Dec;12(12):3976–86.
44. Bustamante LY, Bartholdson SJ, Crosnier C, Campos MG, Wanaguru M, Nguon C, et al. A full-length recombinant Plasmodium falciparum PfRH5 protein induces inhibitory antibodies that are effective across common PfRH5 genetic variants. *Vaccine*. 2013 Jan 2;31(2):373–9.
45. Cox-Singh J, Davis TME, Lee K-S, Shamsul SSG, Matusop A, Ratnam S, et al. Plasmodium knowlesi malaria in humans is widely distributed and potentially life threatening. *Clin Infect Dis Off Publ Infect Dis Soc Am*. 2008 Jan 15;46(2):165–71.
46. Mohring F, Hart MN, Rawlinson TA, Henrici R, Charleston JA, Diez Benavente E, et al. Rapid and iterative genome editing in the malaria parasite Plasmodium knowlesi provides new tools for P. vivax research. *eLife*. 2019 Jun 17;8:e45829.
47. Singh AP, Ozwara H, Kocken CHM, Puri SK, Thomas AW, Chitnis CE. Targeted deletion of Plasmodium knowlesi Duffy binding protein confirms its role in junction formation during invasion: P. knowlesi Duffy binding protein and invasion. *Mol Microbiol*. 2005 Mar;55(6):1925–34.
48. Tham W-H, Beeson JG, Rayner JC. Plasmodium vivax vaccine research – we’ve only just begun. *Int J Parasitol*. 2017 Feb 1;47(2):111–8.
49. Draper SJ, Sack BK, King CR, Nielsen CM, Rayner JC, Higgins MK, et al. Malaria Vaccines: Recent Advances and New Horizons. *Cell Host Microbe*. 2018 Jul;24(1):43–56.

50. Lim C, Hansen E, DeSimone TM, Moreno Y, Junker K, Bei A, et al. Expansion of host cellular niche can drive adaptation of a zoonotic malaria parasite to humans. *Nat Commun.* 2013;4:1638.
51. Verzier LH, Coyle R, Singh S, Sanderson T, Rayner JC. *Plasmodium knowlesi* as a model system for characterising *Plasmodium vivax* drug resistance candidate genes. Pimenta P, editor. *PLoS Negl Trop Dis.* 2019 Jun 3;13(6):e0007470.
52. Muh F, Ahmed MA, Han J-H, Nyunt MH, Lee S-K, Lau YL, et al. Cross-species analysis of apical asparagine-rich protein of *Plasmodium vivax* and *Plasmodium knowlesi*. *Sci Rep.* 2018 Dec;8(1):5781.
53. Vermeulen AN, Roeffen WF, Henderik JB, Ponnudurai T, Beckers PJ, Meuwissen JH. *Plasmodium falciparum* transmission blocking monoclonal antibodies recognize monovalently expressed epitopes. *Dev Biol Stand.* 1985;62:91–7.
54. Quakyi IA, Carter R, Renner J, Kumar N, Good MF. The 230-kDa gamete surface protein of *Plasmodium falciparum* is also a target for transmission-blocking antibodies. :6.
55. Kapulu MC, Da DF, Miura K, Li Y, Blagborough AM, Churcher TS, et al. Comparative Assessment of Transmission-Blocking Vaccine Candidates against *Plasmodium falciparum*. *Sci Rep.* 2015 Sep;5(1):11193.
56. França CT, Hostetler JB, Sharma S, White MT, Lin E, Kiniboro B, et al. An Antibody Screen of a *Plasmodium vivax* Antigen Library Identifies Novel Merozoite Proteins Associated with Clinical Protection. Engwerda CR, editor. *PLoS Negl Trop Dis.* 2016 May 16;10(5):e0004639.
57. França CT, White MT, He W-Q, Hostetler JB, Brewster J, Frato G, et al. Identification of highly-protective combinations of *Plasmodium vivax* recombinant proteins for vaccine development. *eLife.* 2017 Sep 26;6:e28673.
58. Longley RJ, França CT, White MT, Kumpitak C, Sa-angchai P, Gruszczyk J, et al. Asymptomatic *Plasmodium vivax* infections induce robust IgG responses to multiple blood-stage proteins in a low-transmission region of western Thailand. *Malar J.* 2017 Dec;16(1):178.
59. Li J, Ito D, Chen J-H, Lu F, Cheng Y, Wang B, et al. Pv12, a 6-Cys antigen of *Plasmodium vivax*, is localized to the merozoite rhoptry. *Parasitol Int.* 2012 Sep;61(3):443–9.
60. Wickramarachchi T, Devi YS, Mohmmed A, Chauhan VS. Identification and Characterization of a Novel *Plasmodium falciparum* Merozoite Apical Protein Involved in Erythrocyte Binding and Invasion. Doolan DL, editor. *PLoS ONE.* 2008 Mar 5;3(3):e1732.
61. Moreno-Pérez DA, Saldarriaga A, Patarroyo MA. Characterizing PvARP, a novel *Plasmodium vivax* antigen. *Malar J.* 2013;12(1):165.
62. Arumugam TU, Takeo S, Yamasaki T, Thonkukiatkul A, Miura K, Otsuki H, et al. Discovery of GAMA, a *Plasmodium falciparum* Merozoite Micronemal Protein, as a Novel Blood-Stage Vaccine Candidate Antigen. Adams JH, editor. *Infect Immun.* 2011 Nov;79(11):4523–32.

63. Changrob S, Han J-H, Ha K-S, Park WS, Hong S-H, Chootong P, et al. Immunogenicity of glycosylphosphatidylinositol-anchored micronemal antigen in natural *Plasmodium vivax* exposure. *Malar J.* 2017 Dec;16(1):348.
64. Hinds L, Green JL, Knuepfer E, Grainger M, Holder AA. Novel Putative Glycosylphosphatidylinositol-Anchored Micronemal Antigen of *Plasmodium falciparum* That Binds to Erythrocytes. *Eukaryot Cell.* 2009 Dec;8(12):1869–79.
65. Chitnis CE, Miller LH. Identification of the erythrocyte binding domains of *Plasmodium vivax* and *Plasmodium knowlesi* proteins involved in erythrocyte invasion. *J Exp Med.* 1994 Aug 1;180(2):497–506.
66. Sampath S, Carrico C, Janes J, Gurumoorthy S, Gibson C, Melcher M, et al. Glycan Masking of *Plasmodium vivax* Duffy Binding Protein for Probing Protein Binding Function and Vaccine Development. Kazura JW, editor. *PLoS Pathog.* 2013 Jun 13;9(6):e1003420.
67. Ntumngia FB, Pires CV, Barnes SJ, George MT, Thomson-Luque R, Kano FS, et al. An engineered vaccine of the *Plasmodium vivax* Duffy binding protein enhances induction of broadly neutralizing antibodies. *Sci Rep.* 2017 Dec;7(1):13779.
68. George MT, Schloegel JL, Ntumngia FB, Barnes SJ, King CL, Casey JL, et al. Identification of an Immunogenic Broadly Inhibitory Surface Epitope of the *Plasmodium vivax* Duffy Binding Protein Ligand Domain. Sinnis P, editor. *mSphere.* 2019 May 15;4(3):e00194-19, /msphere/4/3/mSphere194-19.atom.
69. Protein Molecular Weight [Internet]. [cited 2020 Jul 30]. Available from: [https://www.bioinformatics.org/sms/prot\\_mw.html](https://www.bioinformatics.org/sms/prot_mw.html)
70. Theron M, Cross N, Cawkill P, Bustamante LY, Rayner JC. An in vitro erythrocyte preference assay reveals that *Plasmodium falciparum* parasites prefer Type O over Type A erythrocytes. *Sci Rep.* 2018 Dec;8(1):8133.
71. Wickham H. ggplot2: Elegant Graphics for Data Analysis [Internet]. [cited 2020 Jul 30]. Available from: <https://ggplot2-book.org/>
72. ggpubr package | R Documentation [Internet]. [cited 2020 Jul 30]. Available from: <https://www.rdocumentation.org/packages/ggpubr/versions/0.4.0>
73. Streamlined Plot Theme and Plot Annotations for “ggplot2” [Internet]. [cited 2020 Jul 30]. Available from: <https://wilkelab.org/cowplot/>
74. A Forward-Pipe Operator for R [Internet]. [cited 2020 Jul 30]. Available from: <https://magrittr.tidyverse.org/>
75. Read Excel Files [Internet]. [cited 2020 Jul 30]. Available from: <https://readxl.tidyverse.org/>
76. dplyr: A Grammar of Data Manipulation version 1.0.0 from CRAN [Internet]. [cited 2020 Jul 30]. Available from: <https://rdr.io/cran/dplyr/>

77. Cloud-Based Informatics Platform for Life Sciences R&D | Benchling [Internet]. [cited 2020 Jul 30]. Available from: <https://www.benchling.com/>
78. CRISPR gRNA (guide RNA) Design Tool for Eukaryotic Pathogens [Internet]. [cited 2020 Jul 30]. Available from: <http://grna.ctegd.uga.edu/>
79. Langmead B, Salzberg SL. Fast gapped-read alignment with Bowtie 2. *Nat Methods*. 2012 Mar 4;9(4):357–9.
80. Li H, Handsaker B, Wysoker A, Fennell T, Ruan J, Homer N, et al. The Sequence Alignment/Map format and SAMtools. *Bioinformatics*. 2009 Aug 15;25(16):2078–9.
81. Thorvaldsdottir H, Robinson JT, Mesirov JP. Integrative Genomics Viewer (IGV): high-performance genomics data visualization and exploration. *Brief Bioinform*. 2013 Mar 1;14(2):178–92.
82. Robinson JT, Thorvaldsdóttir H, Winckler W, Guttman M, Lander ES, Getz G, et al. Integrative genomics viewer. *Nat Biotechnol*. 2011 Jan;29(1):24–6.
83. Robinson JT, Thorvaldsdóttir H, Wenger AM, Zehir A, Mesirov JP. Variant Review with the Integrative Genomics Viewer. *Cancer Res*. 2017 Nov 1;77(21):e31–4.
84. *Bioinformatics And Functional Genomics, 2nd Edition | Pevsner Lab* [Internet]. [cited 2020 Jul 30]. Available from: <http://bioinfbook.org/php/?q=book2>

777

778

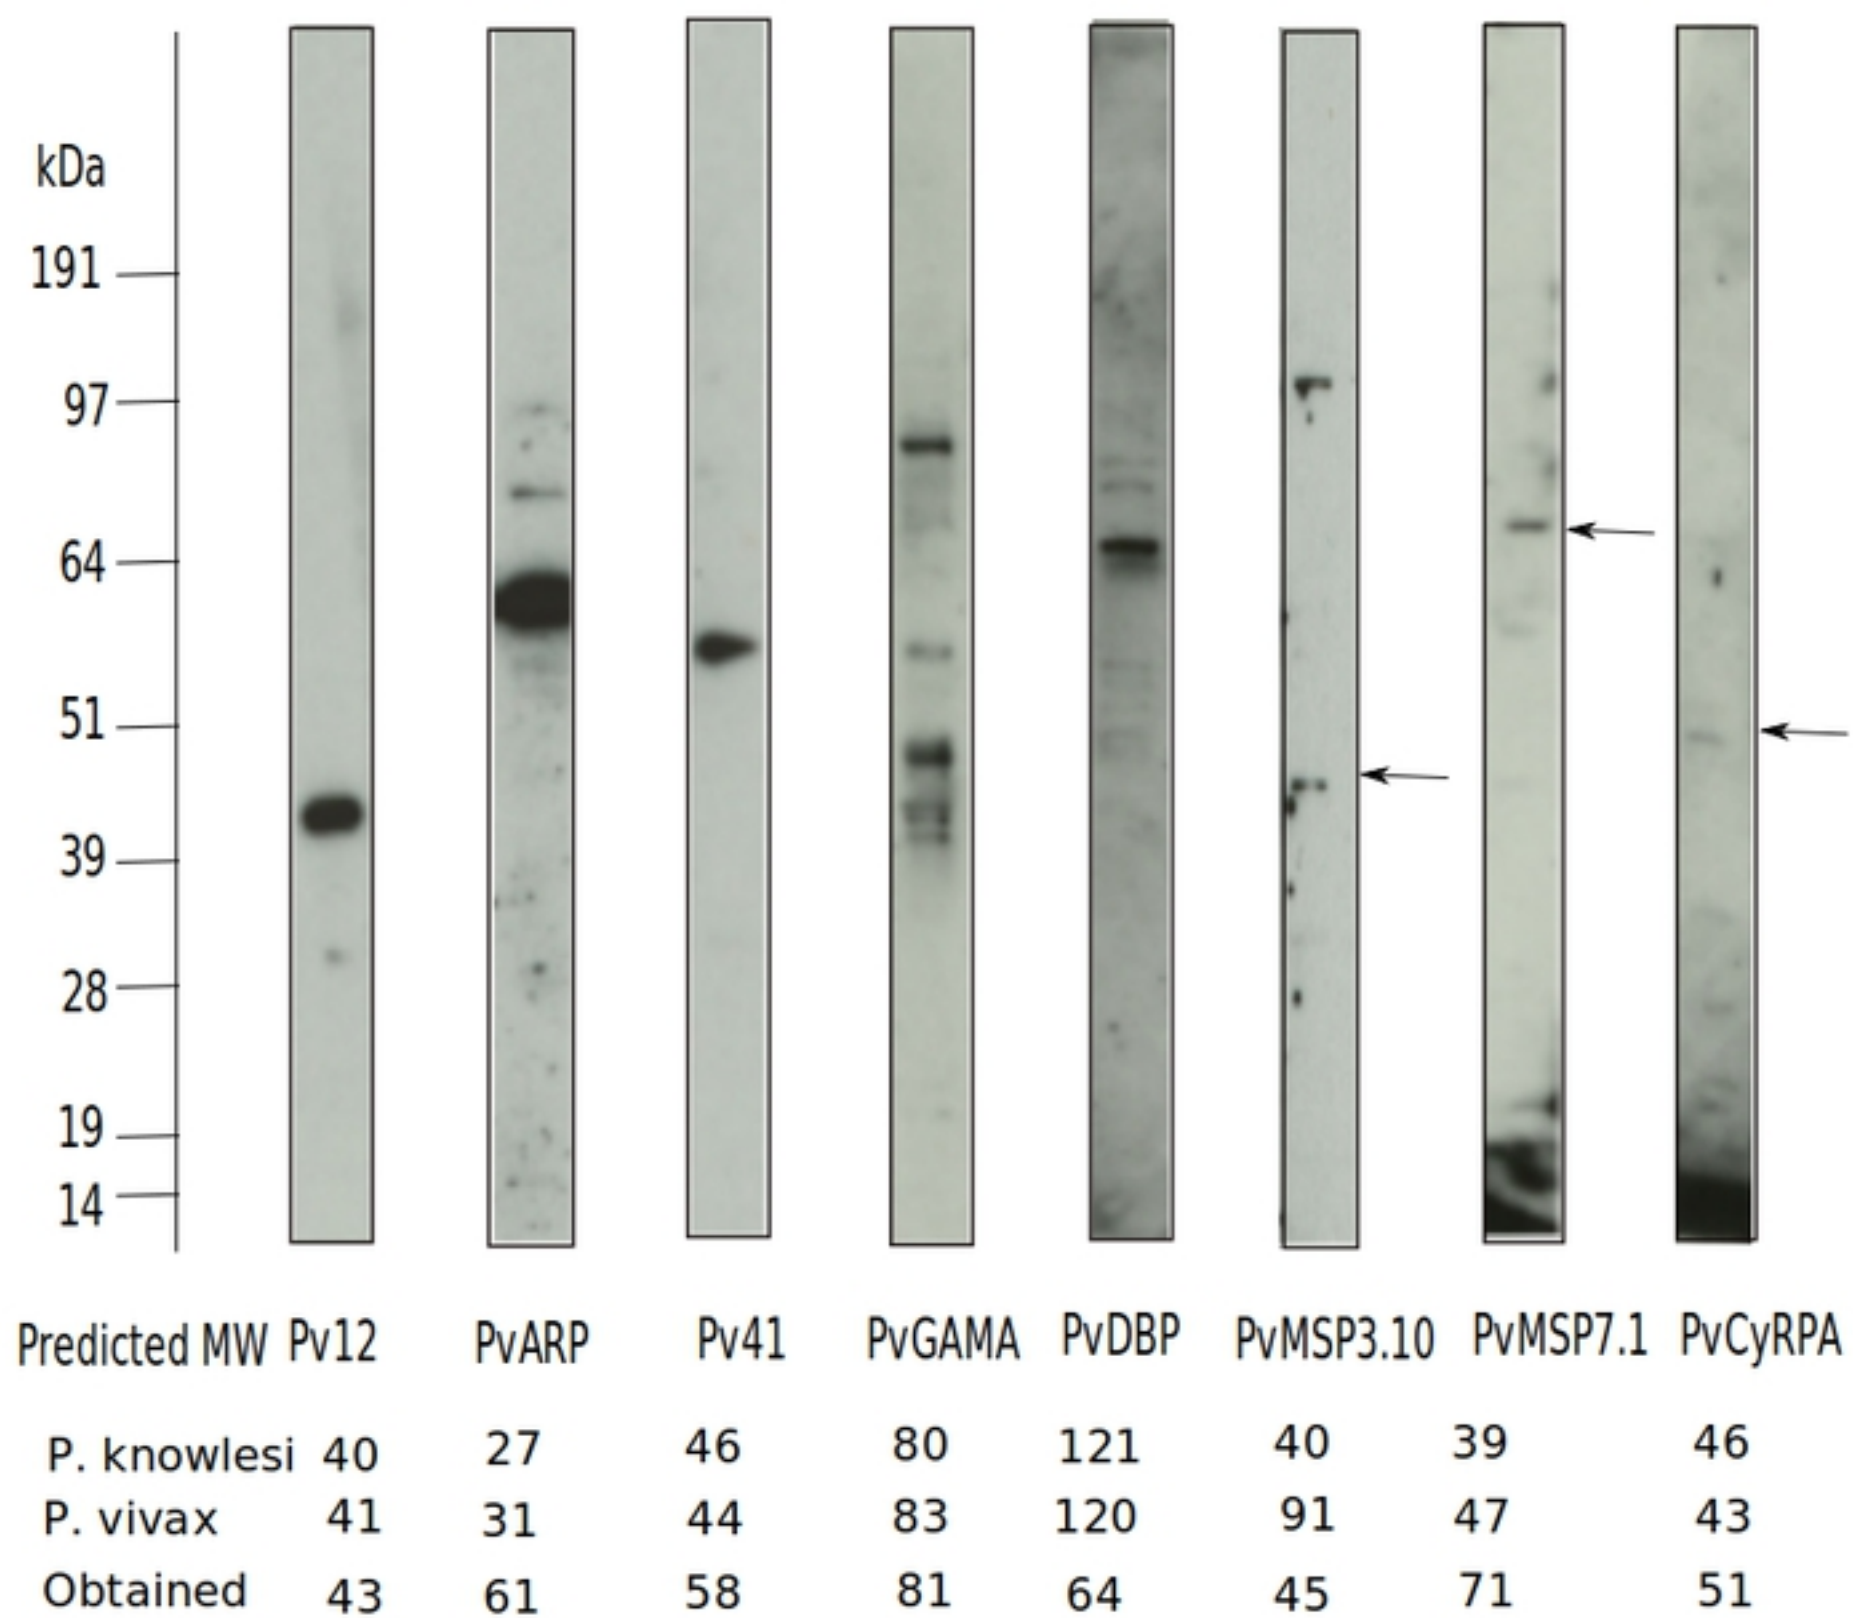

Fig 1

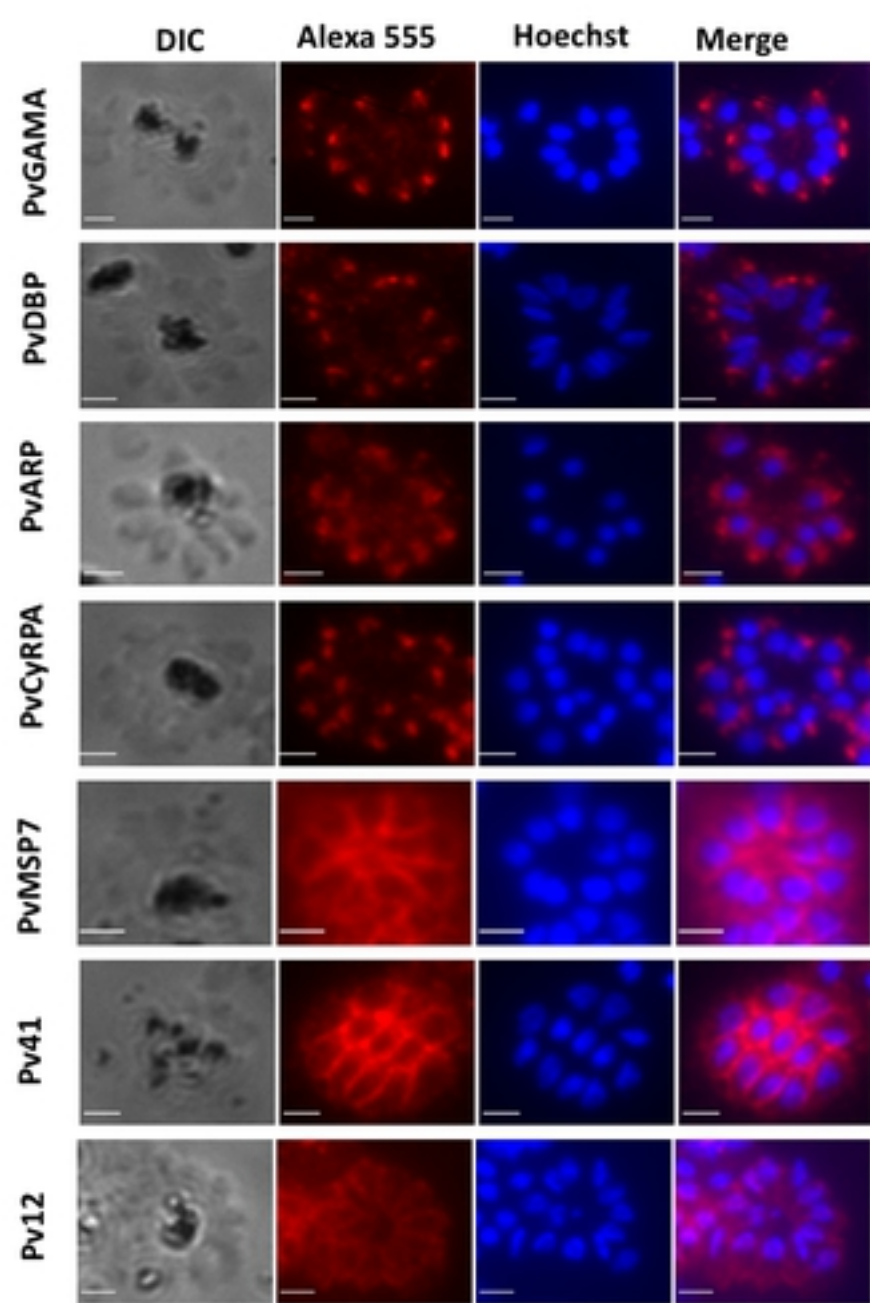

Fig 2

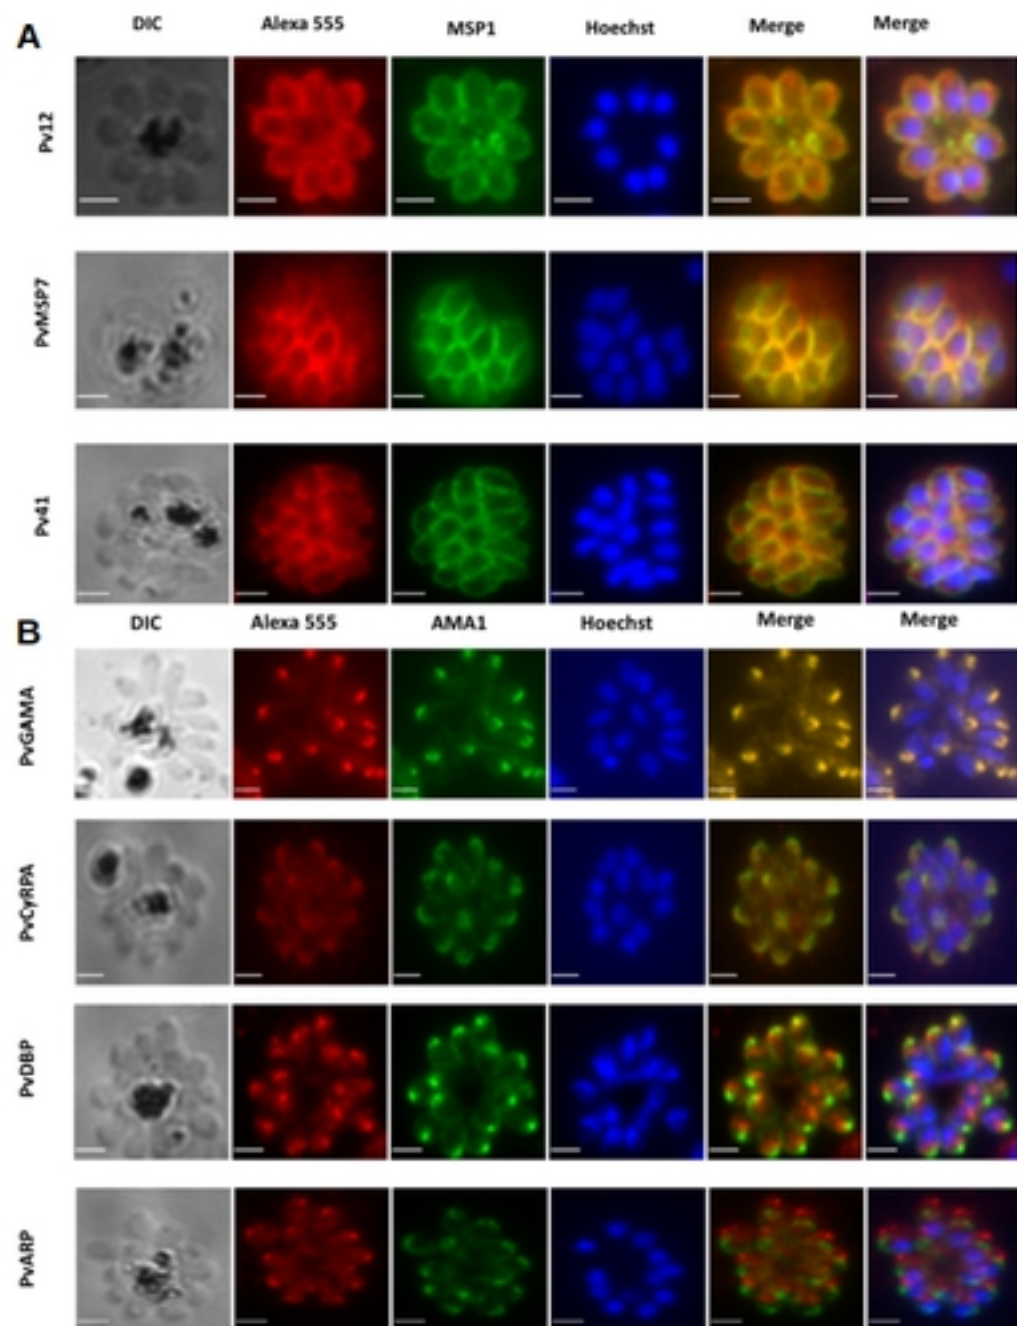

Fig 3

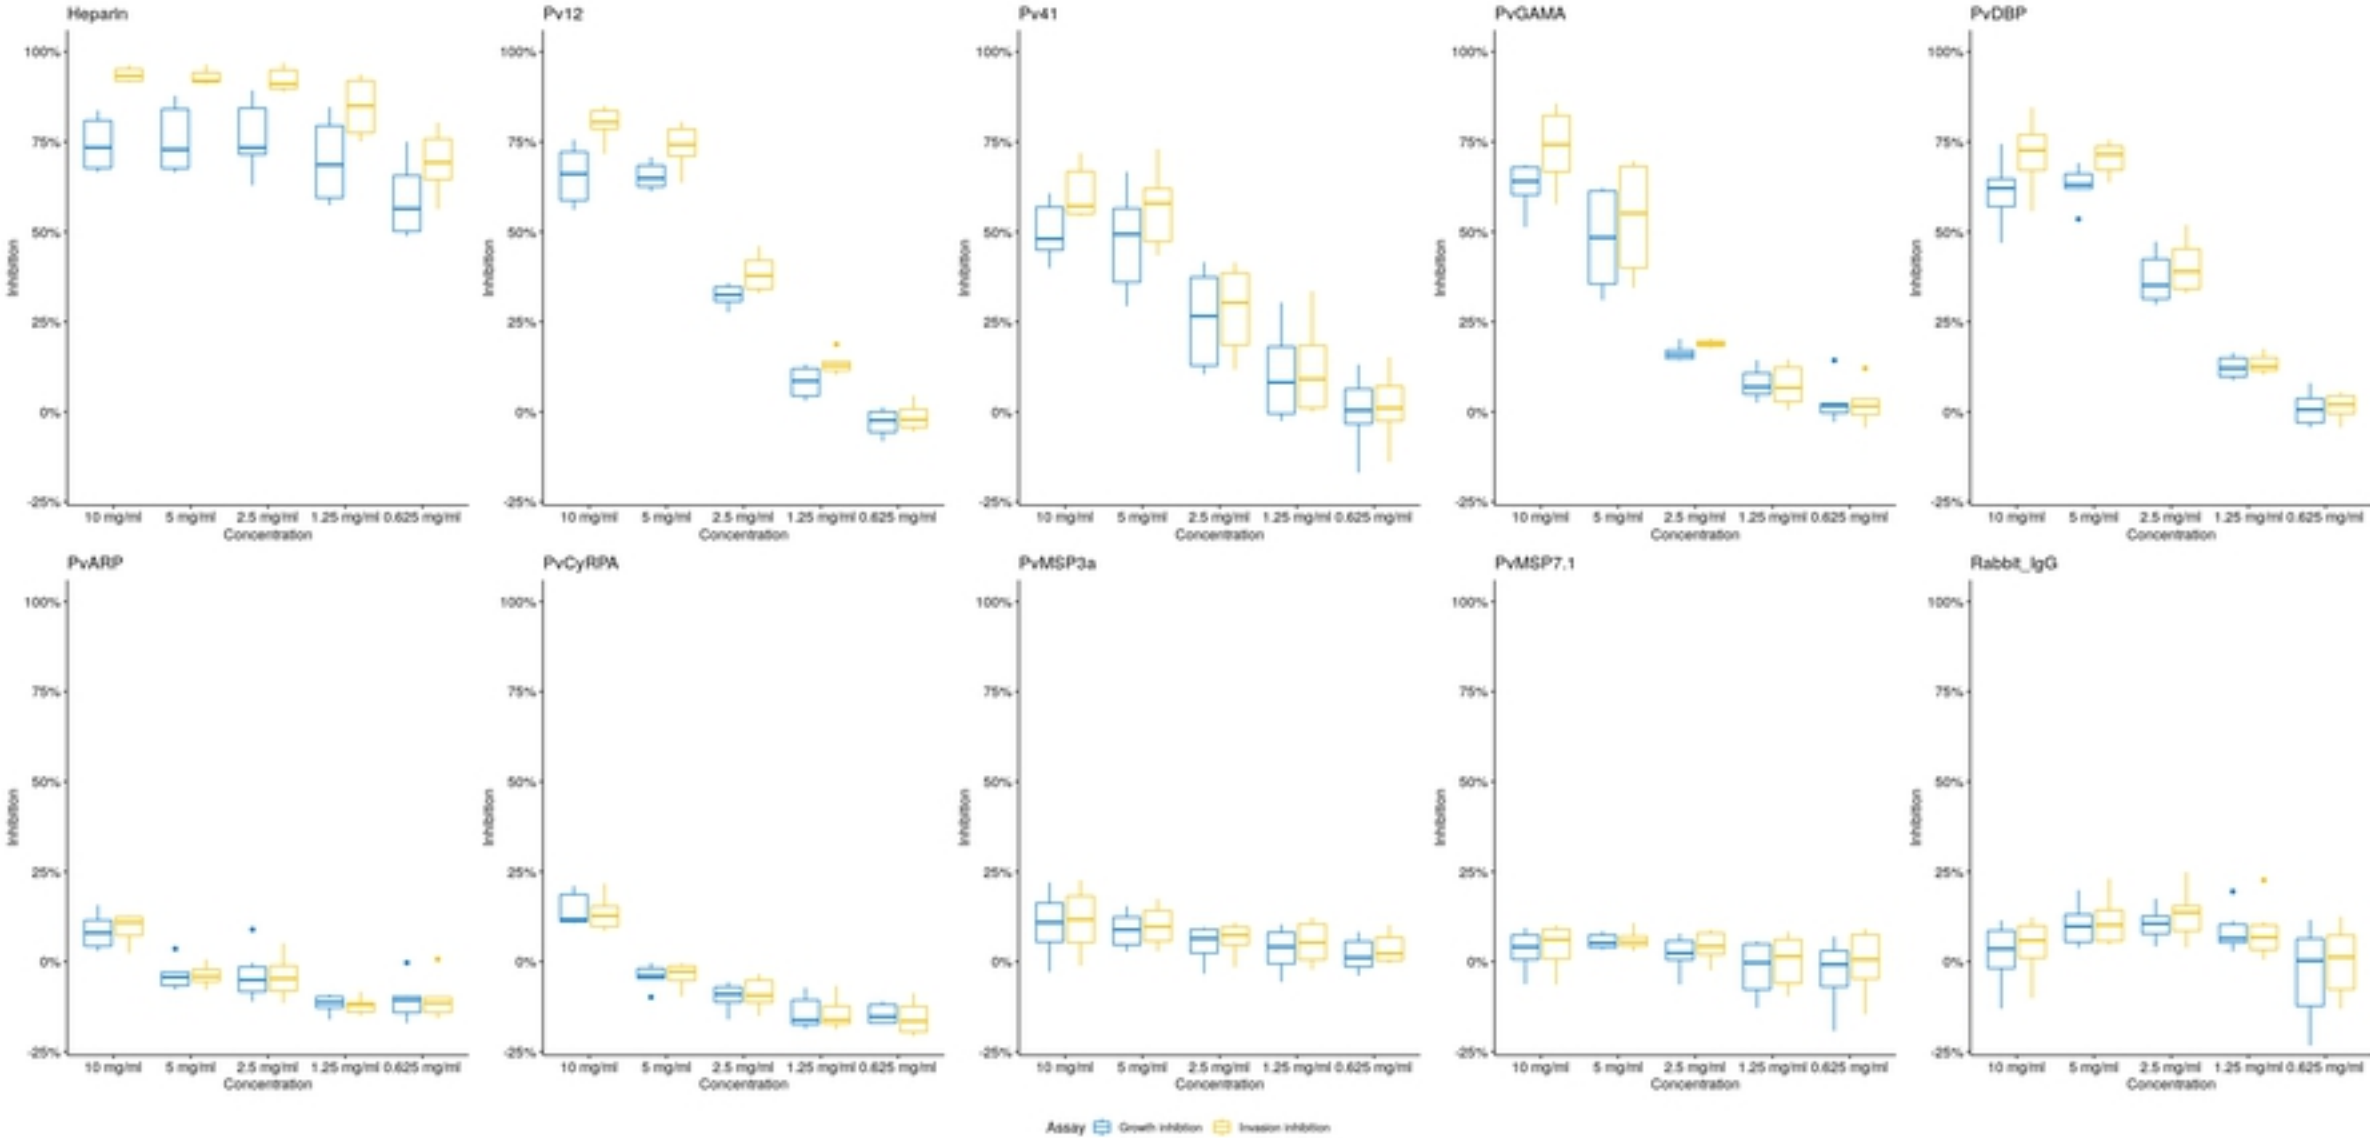

Fig 4



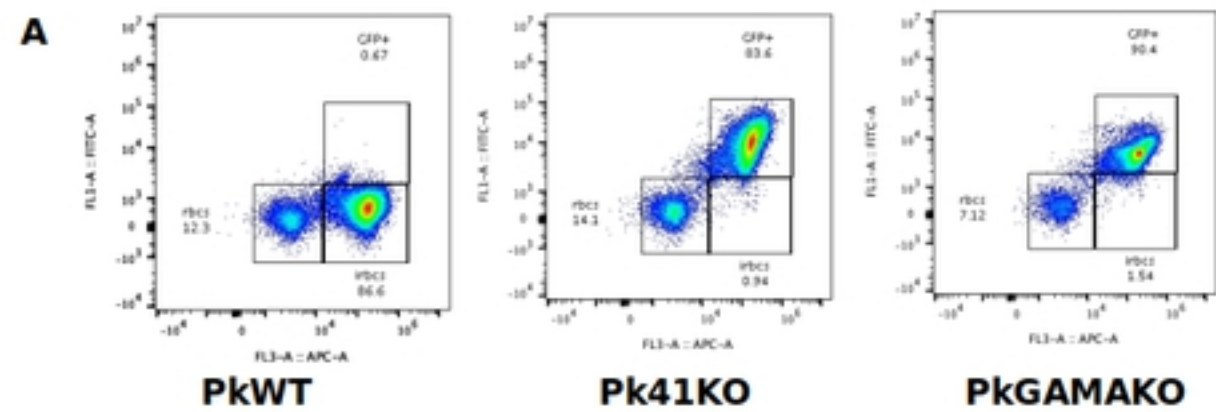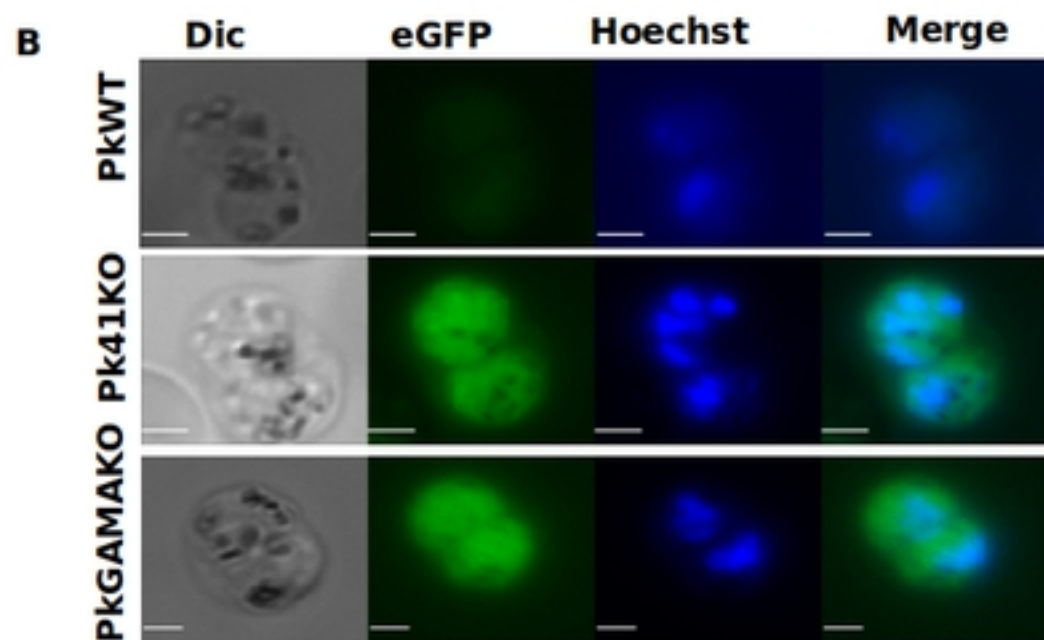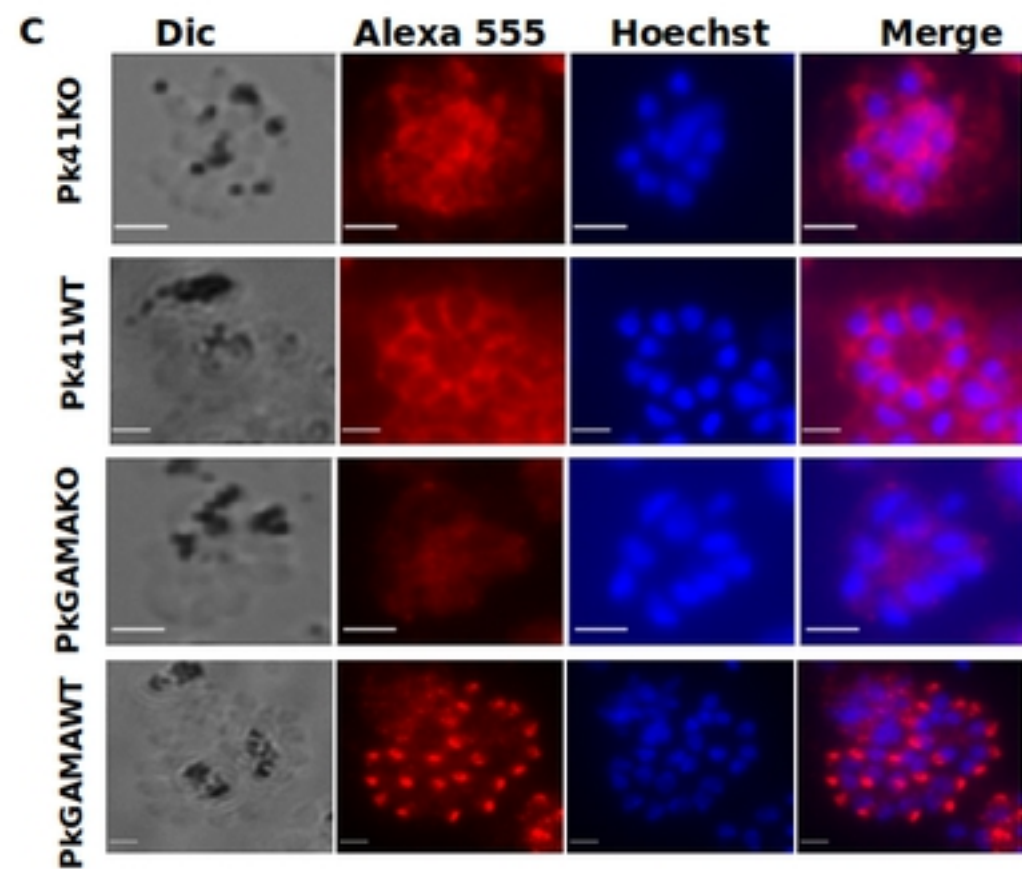

Fig 5

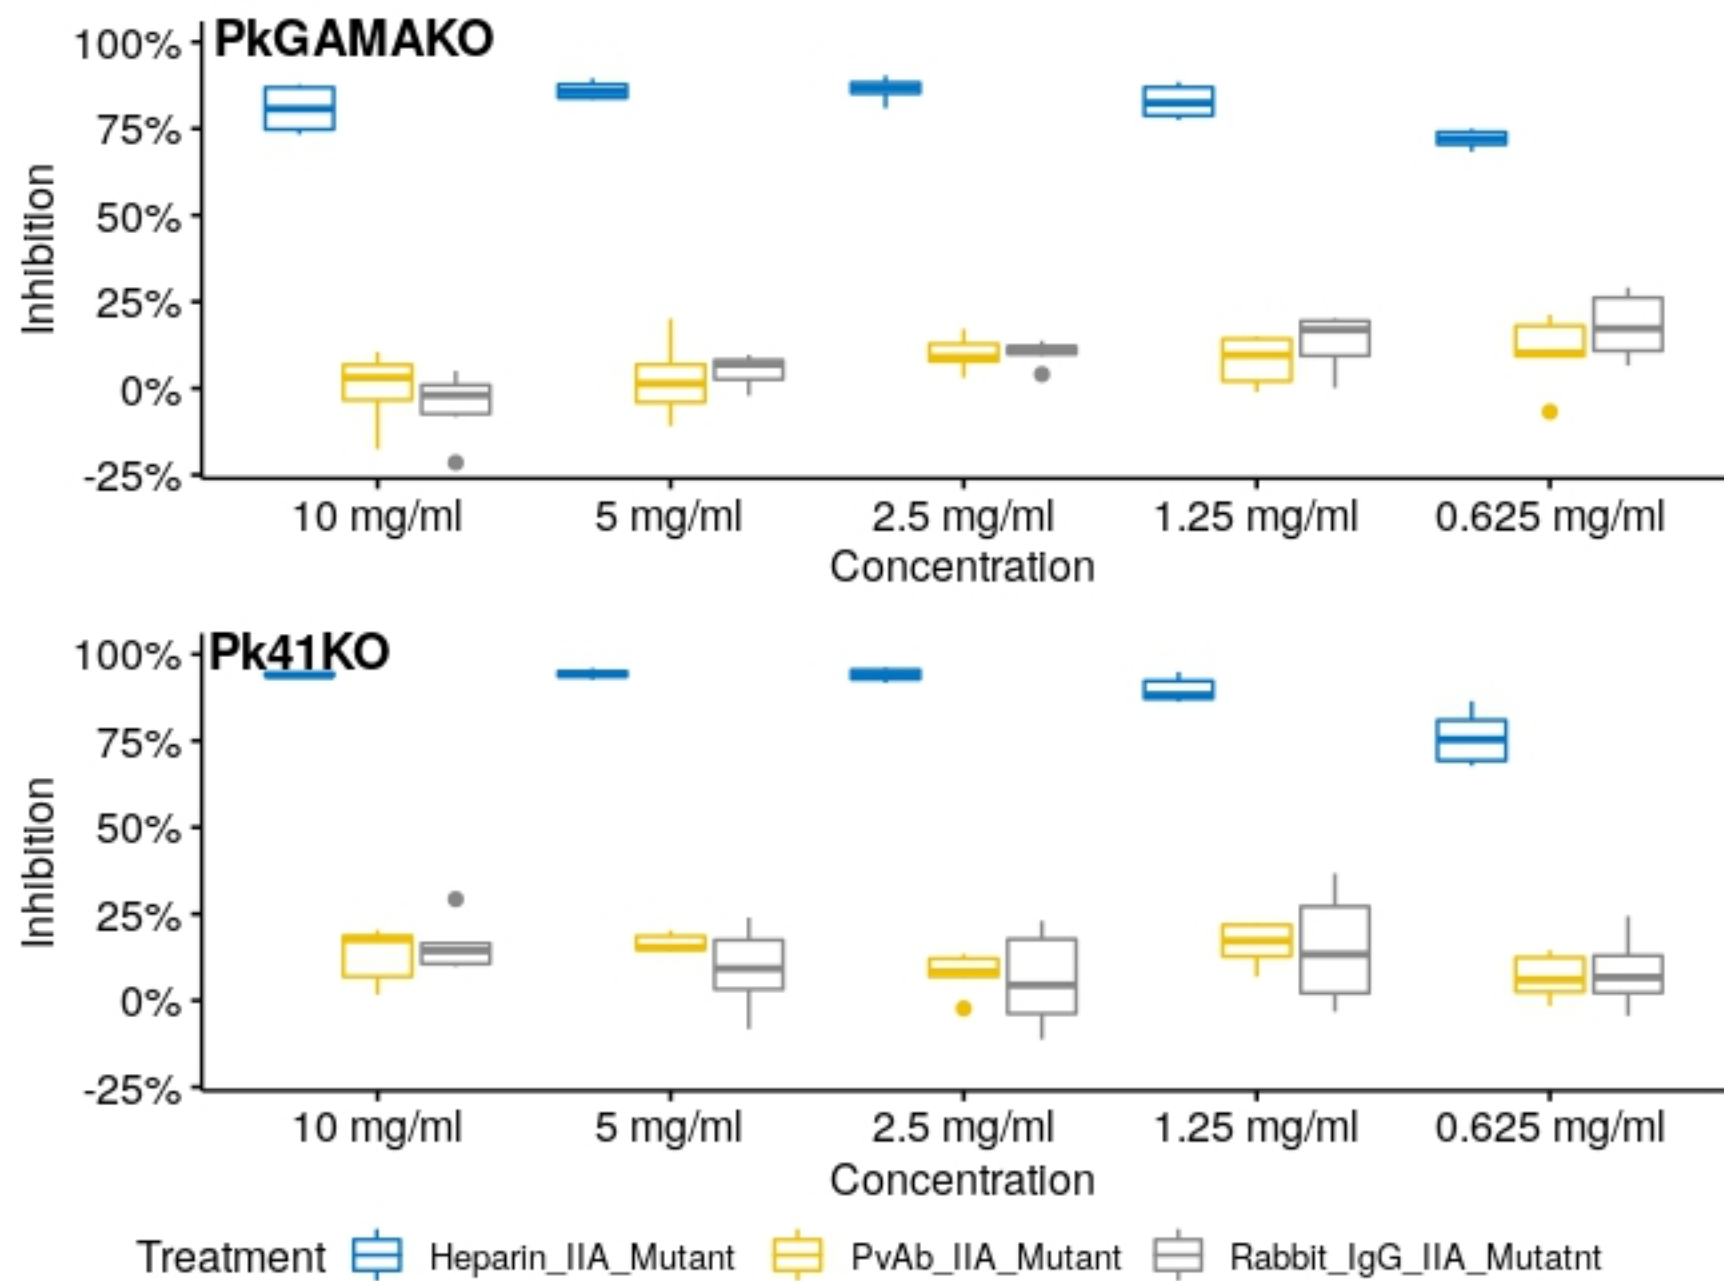

Fig 6

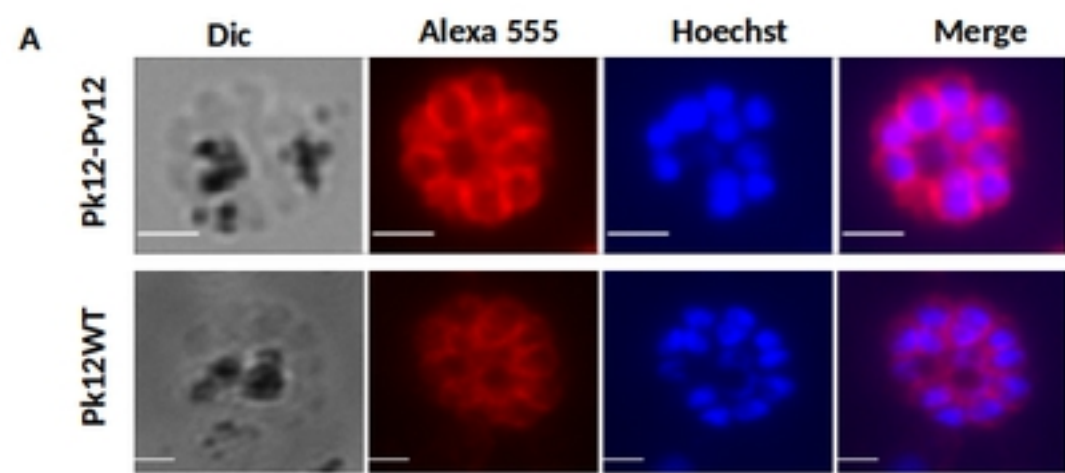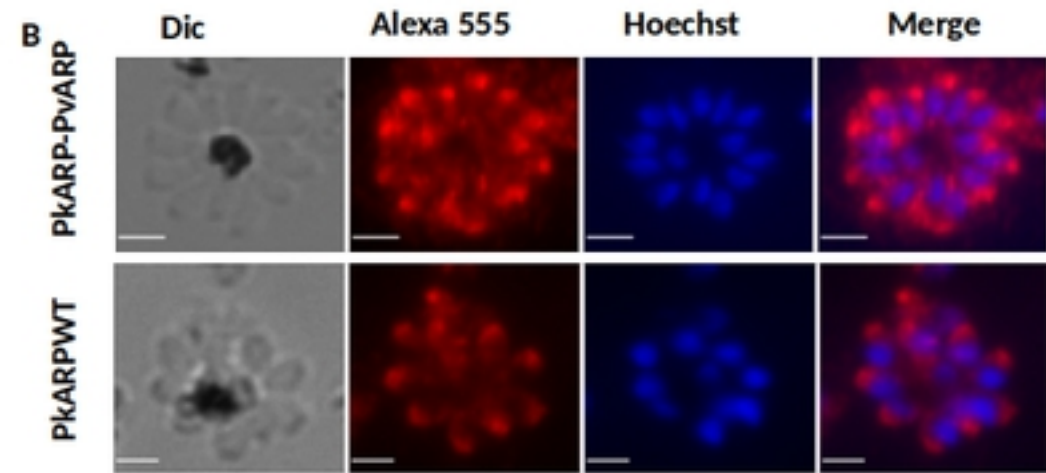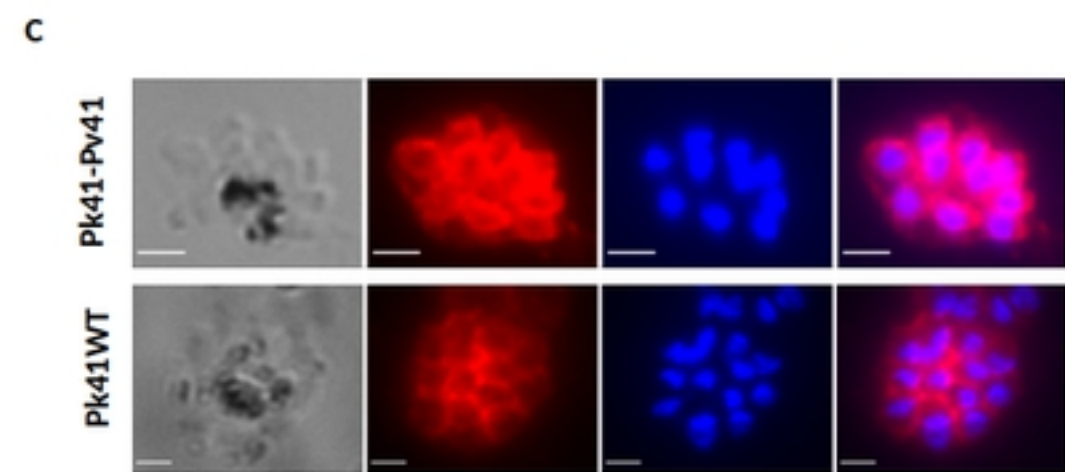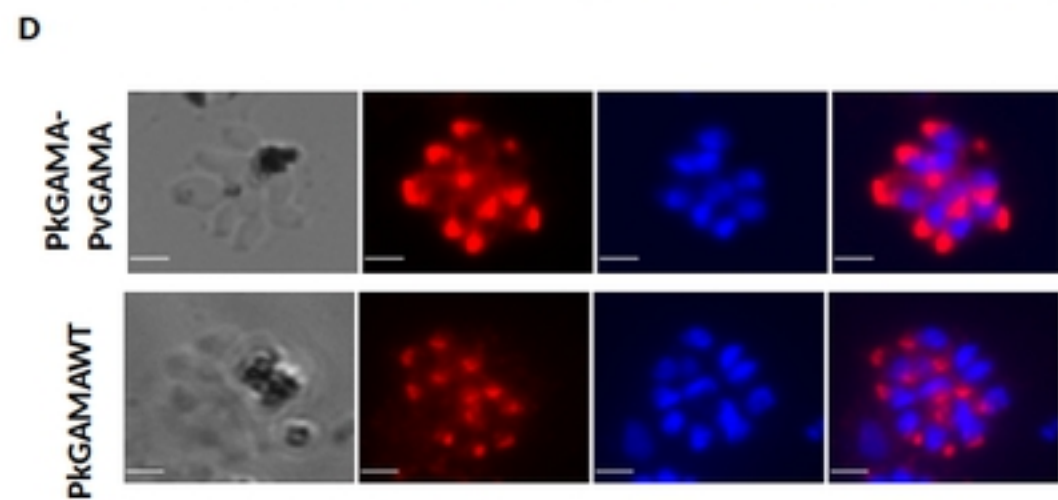

Fig 7

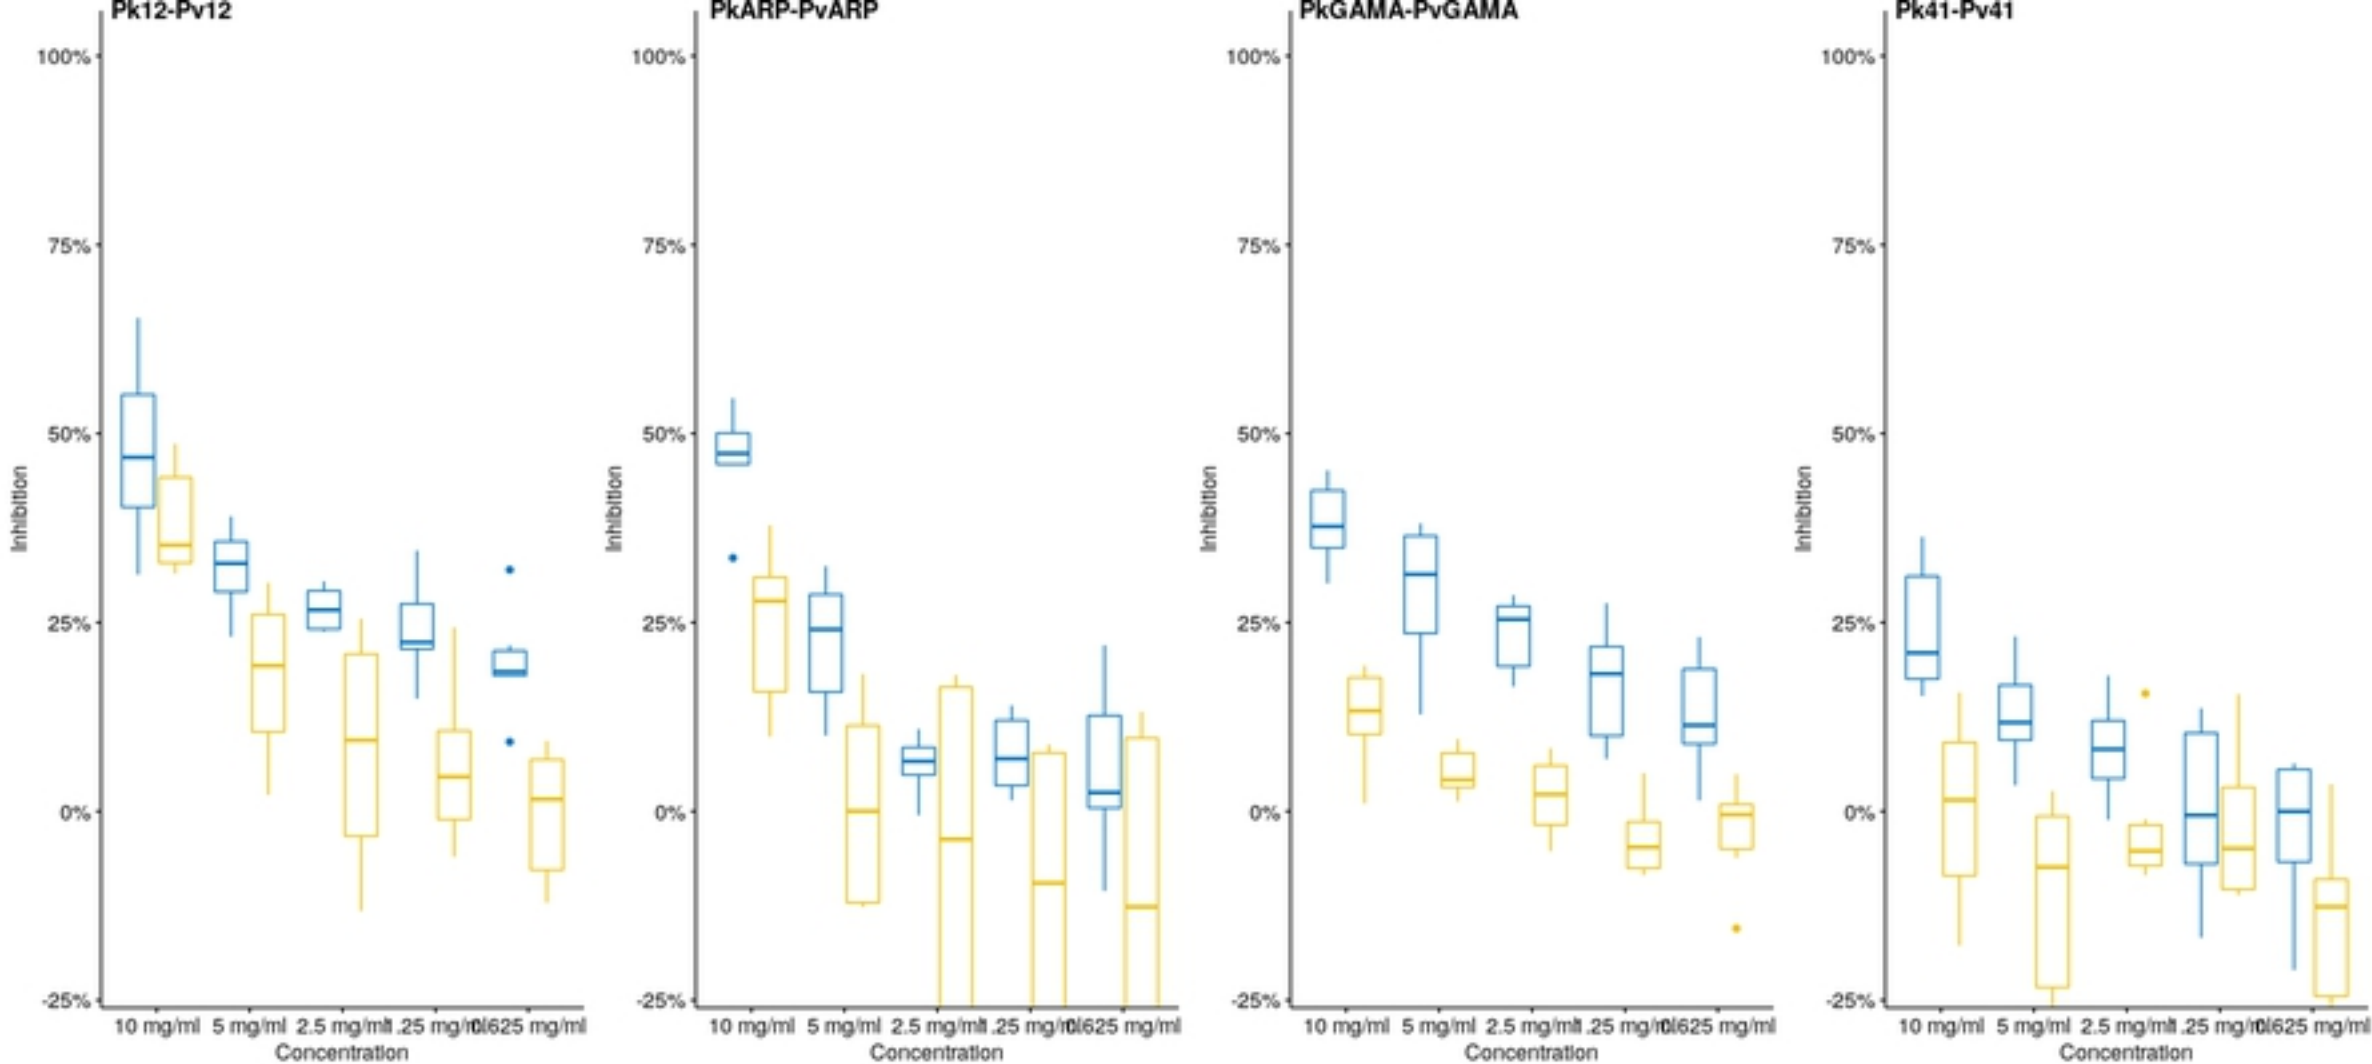

Fig 8
